# Supplementary material
Source: ML conference proceedings conference paper supplement (https://openreview.net/forum?id=W3Csbs2oEl)
Supplement: supplementary_material [file attachment]

# 000 AXIS: EXPLAINABLE TIME SERIES ANOMALY DE- 001 TECTION WITH LARGE LANGUAGE MODELS 002 003 004

005 **Anonymous authors**

006 Paper under double-blind review

## 007 008 009 ABSTRACT

010  
011 Time-series anomaly detection (TSAD) increasingly demands explanations that  
012 articulate not only if an anomaly occurred, but also what pattern it exhibits and  
013 why it is anomalous. Leveraging the impressive explanatory capabilities of Large  
014 Language Models (LLMs), recent works have attempted to treat time series as text  
015 for explainable TSAD. However, this approach faces a fundamental challenge:  
016 LLMs operate on discrete tokens and struggle to directly process long, continuous  
017 signals. Consequently, naive time-to-text serialization suffers from a lack of con-  
018 textual grounding and representation alignment between the two modalities. To  
019 address this gap, we introduce AXIS, a framework that conditions a frozen LLM  
020 for nuanced time-series understanding. Instead of direct serialization, AXIS en-  
021 richens the LLM’s input with three complementary hints derived from the series:  
022 (i) a symbolic numeric hint for numerical grounding, (ii) a context-integrated,  
023 step-aligned hint distilled from a pretrained time-series encoder to capture fine-  
024 grained dynamics, and (iii) a task-prior hint that encodes global anomaly char-  
025 acteristics. Furthermore, to facilitate robust evaluation of explainability, we in-  
026 troduce a new benchmark featuring multi-format questions and rationales that  
027 supervise contextual grounding and pattern-level semantics. Extensive experi-  
028 ments, including both LLM-based and human evaluations, demonstrate that AXIS  
029 yields explanations of significantly higher quality and achieves competitive detec-  
030 tion accuracy compared to general-purpose LLMs, specialized time-series LLMs,  
031 and time-series Vision Language Models. The code is available in <https://anonymous.4open.science/r/TimeSemantic-1742/main.py>  
032

## 033 1 INTRODUCTION

034  
035 Time Series Anomaly Detection (TSAD) is essential for  
036 safeguarding critical systems across domains (Iqbal et al.,  
037 2019; Zeufack et al., 2021; Hundman et al., 2018). While  
038 deep learning models can detect anomalies with high accu-  
039 racy (Fig. 1(a)), their adoption in real-world systems  
040 is limited by two challenges. First, their reasoning pro-  
041 cess is essentially a black box. Experts remain in the dark  
042 when asking the most practical question: why was this  
043 anomaly flagged? Post-hoc attribution methods such as  
044 SHAP (Fig. 1(b)) attempt to fill this void, but they merely  
045 repackage correlations into statistical features. Such attri-  
046 butions reveal what inputs influenced the model, but they  
047 stop short of offering why the underlying anomaly event  
048 occurred. Second, these models are brittle. Trained nar-  
049 rowly - often on a single dataset - they capture dataset-  
050 specific features rather than generalizable patterns. In  
051 fast-changing environments where anomalies manifest in  
052 diverse forms, this rigidity is crippling: models must be  
053 retrained at high cost, yet still fail to transfer across domains. What is missing is the ability to han-  
054 dle anomalies universally—to recognize and adapt across diverse failure patterns without exhaustive  
055 retraining.

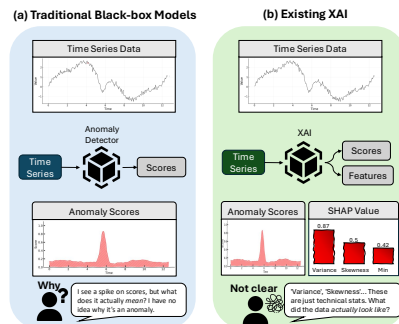

Figure 1: Deep learning method for TSAD: (a) Opaque anomaly scores fail to explain why; (b) XAI features lack intuitive semantics;

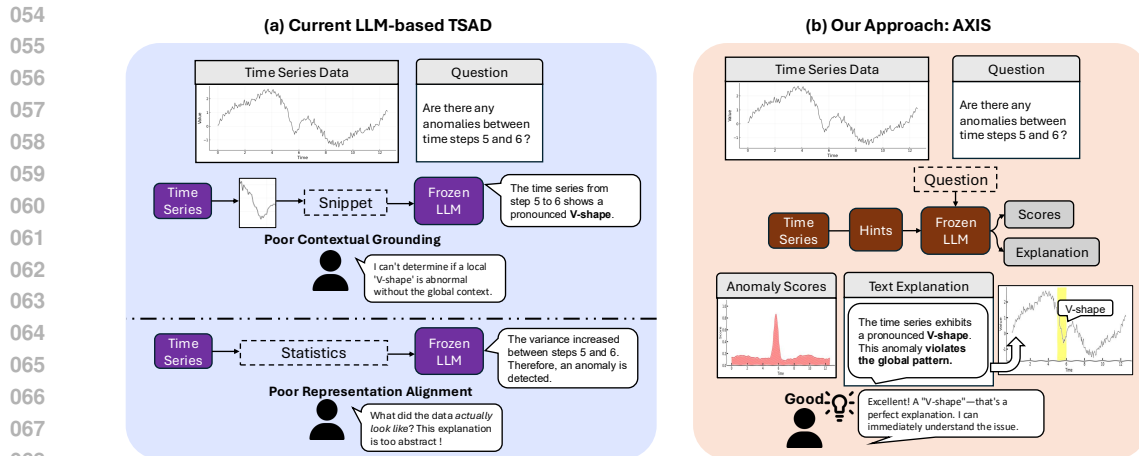

Figure 2: Bridging the Semantic Gap in Time Series Anomaly Explanation. (a) Current LLM-based methods fail due to: (i) poor **Contextual Grounding**, where observing a local pattern (e.g., the “V-shape”) in isolation prevents a meaningful diagnosis; and (ii) **Representation Misalignment**, where inputs of abstract statistics (e.g., “variance increased”) lead to uninformative, circular explanations. (b) Our approach overcomes these limitations by producing contextualized, pattern-level explanations that align with expert reasoning.

In response to these limitations, the community has turned to Large Language Models (LLMs), celebrated for their fluency and generalization. Yet critical obstacles remain: LLMs operate on discrete tokens, making them ill-suited for the long, continuous nature of time series (Dong et al., 2024). Attempting to fit these signals into tokenized inputs often incurs lossy serialization, forcing workarounds that undercut the LLM’s capabilities. Common strategies—feeding isolated fragments or pre-aggregated statistics—reduce the model to a mere post-hoc translator. As our motivating example illustrates (Fig. 2(a)), this naive approach, however, suffers a critical semantic gap, driven by two fundamental failures.

The first is a lack of **Contextual Grounding**. By analyzing only a narrow snippet of the series, the LLM is deprived of the broader temporal context required to discern whether a local pattern is genuinely anomalous or merely a benign fluctuation. The second is a failure of **Representation Alignment**, which creates a chasm between the model’s analytical basis and human intuition. When an LLM is fed abstract statistical summaries instead of the data’s intrinsic shape, its explanations degenerate into shallow echoes of its inputs, failing to provide the qualitative, pattern-level insights that domain experts require to understand what truly happened in the data.

Overcoming these failures requires a paradigm shift. Explanations must move beyond statistical paraphrasing toward a native integration of temporal dynamics and linguistic reasoning. This reduces to two core challenges: the **Contextual Grounding Challenge**, which demands interpreting local events in the context of the full series to explain not only what the data looks like but **why** it is abnormal; and the **Representation Alignment Challenge**, which requires bridging the semantic gap between low-level numerical signals and the rich, shape-based concepts underlying human reasoning.

In this paper, we introduce **AXIS**, a framework designed to address these challenges and unlock the explanatory potential of LLMs for TSAD. Our approach rests on two synergistic contributions. First, to establish the necessary semantic foundation, we construct a novel benchmark with pattern-level labels and rich contextual cues, providing the semantic foundation essential for both grounding and alignment. Second, at the core of our framework is a Hint Tuner that systematically tackles both challenges. For contextual grounding, it distills global time-series information into a compact, informative “hint.” For representation alignment, it maps this temporal hint into the LLM’s native semantic space. This integrated design transforms a frozen, general-purpose LLM into a context-aware diagnostic expert, capable of generating correct and high-reasonal quality answers for TSAD, as illustrated in Fig. 2(b). In summary, our main contributions are threefold:

- **A Benchmark for Semantic Explanations:** To bridge the “semantic gap” between raw time series signals and linguistic concepts, we construct the first benchmark dedicated to semantic time series anomaly explanation. This benchmark ensures both anomaly diversity and explanation fidelity, providing a principled testbed for evaluating the semantic explainability of TSAD.
- **A Novel Cross-Modal Alignment Framework:** We present AXIS, a framework that aligns a frozen LLM with time-series dynamics. It conditions the LLM on three synergistic inputs: a symbolic numeric hint for numerical grounding, a context-integrated step-aligned hint for fine-grained dynamics, and a task-prior hint for global task priors.
- **Extensive Empirical Validation:** Comprehensive experiments show that AXIS establishes a new state of the art in semantic anomaly explanation, substantially outperforming strong baselines including general LLM, specialized time-series LLM, time series VLM.

## 2 RELATED WORK

**State-of-the-Art TSAD Models and Interpretability Challenges** Classical and statistical methods remain competitive baselines yet produce pointwise scores with weak semantics and limited support for multivariate structure (Liu et al., 2008; Yeh et al., 2016). Deep TSAD improves accuracy via reconstruction (Audibert et al., 2020; Su et al., 2019; Zhang et al., 2019), prediction-residual modeling (Tuli et al., 2022), and attention-centric architectures (Xu et al., 2021; Yang et al., 2023; Shen et al., 2020; Lan et al., 2025), with recent work exploring unified/foundation-style formulations (Shentu et al., 2024; Gao et al., 2024) and diffusion-based detectors (Wang et al., 2025b). Explanations, however, are largely post hoc and tied to low-level contributions (e.g., time-step or feature importance), limiting mechanism-oriented diagnosis. Time-series XAI extends attribution (Bento et al., 2021) and investigates prototype/shapelet/motif views and counterfactual recourse (Bahri et al., 2022; Yeh et al., 2016), but explanations remain grounded in signal-level statistics rather than pattern-level concepts. This motivates treating TSAD explainability as a semantic alignment problem.

**Large Language Models for TSAD** LLMs can function as zero-shot anomaly detectors under appropriate prompting and input scaling (Alnegheimish et al., 2024; Dong et al., 2024; Zhou & Yu, 2024; Wang et al., 2025a). Performance degrades on long-horizon series due to context-length limits, lossy time-to-text serialization, and chunked inference, which together induce memory decay and boundary artifacts. A complementary line uses LLMs as post-hoc reasoners that verbalize anomaly scores, SHAP attributions, or raw subsequences, or coordinate multi-agent annotation (Liu et al., 2025; Lin et al., 2024). In both paradigms, LLMs act mainly as summarizers of low-level signals, yielding descriptive rather than semantically grounded explanations. Our approach directly aligns temporal representations with language via soft-prompt-based conditioning, aiming for faithful, pattern-level explanations.

**Benchmarks for TSAD** Existing benchmarks for time-series question answering, which are adjacent to our task, can be broadly categorized into two paradigms. The first relies on fully synthetic data generation, where normal time series are composed from trends, seasonality, and noise, after which localized anomalies are injected to generate templated or LLM-augmented labels (Cai et al., 2024; Xie et al., 2024; Wang et al., 2025a; Kong et al., 2025). The second paradigm uses real-world datasets, pairing authentic time-series data with corresponding semantic information to create evaluation suites (Kim et al., 2024; Cai et al., 2025; Liu et al., 2024a; Williams et al., 2024; Chen et al., 2025). However, synthetic benchmarks often lack the contextual richness required for robust grounding and representation alignment, while real-world data yields domain-specific explanations that limit model generalizability. To our knowledge, a dedicated benchmark for semantic time series anomaly explanation has remained a critical gap, which our work directly addresses by introducing a benchmark designed for this task.

## 3 METHODOLOGY

This section presents our AXIS framework for the semantic anomaly explanation task. We begin by formalizing the task in Sec. 3.1. Next, we introduce the core architecture in Sec. 3.2. Sec. 3.3

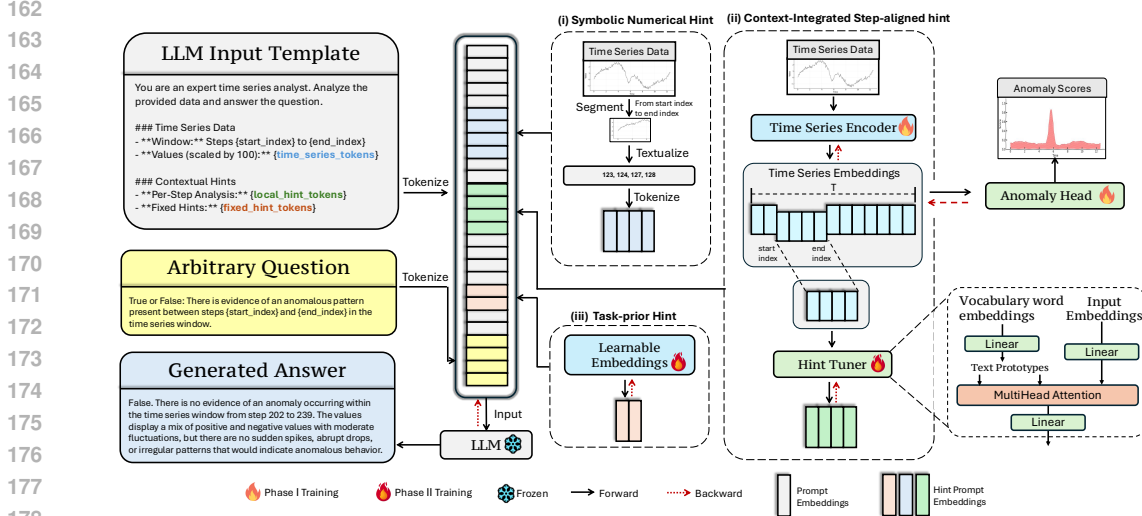

Figure 3: AXIS constructs the prompt by three representation pathways: (i) symbolic numeric grounding via window values, (ii) context-integrated local dynamics through step-aligned hints to capture contextual information, and (iii) task-prior hints encoding global priors.

describes the two-phase training paradigm—encoder pretraining followed by hint tuning with the LLM frozen—and the inference procedure. Finally, to enable systematic supervision, we synthesize a benchmark with pattern-level annotations in Sec. 3.4.

### 3.1 PROBLEM FORMULATION

Conventional TSAD methods typically output point-wise anomaly scores for a series of length  $T$ , but such signals rarely provide human-understandable insights. In practice, anomalies often span contiguous intervals rather than isolated timestamps, and users are chiefly concerned with understanding **why** an interval is anomalous. To address this, we reformulate the task by introducing a target interval  $(s, e)$  and defining the goal as generating a natural-language explanation for it. This window-based formulation respects the temporal continuity of anomalies and makes the explanation task well-posed by localizing reasoning to a specific region within the series. We formalize the problem as follows:

Semantic time series anomaly explanation

Given a univariate time series  $\mathbf{x}_{1:T} \in \mathbb{R}^T$  and a natural-language query  $q$ , the objective is to explain the pattern within an interval  $[s, e]$ ; in our setup,  $(s, e)$  is provided as input. The model learns a mapping  $\mathcal{G}$  that, while conditioning on the entire series  $\mathbf{x}_{1:T}$  to leverage global context, generates an explanation  $\mathbf{y}$  for the target window:

$$\mathcal{G} : (\mathbf{x}_{1:T}, q, s, e) \mapsto \mathbf{y}.$$

### 3.2 AXIS FRAMEWORK

We now propose our novel framework called AXIS for semantic anomaly explanation task. AXIS conditions a frozen LLM through three representation pathways: symbolic numeric hint, context-integrated step-aligned hint, and task-prior hint. The overall framework is shown in Fig. 3. We instantiate this conditioning through three pathways that jointly provide numeric grounding, step-aligned dynamics under global context, and compact task-level priors, without expanding the context length or modifying the LLM.

**Symbolic Numeric Hint.** LLMs possess native reasoning capabilities over discrete numerals when presented symbolically, even in zero-shot settings. To exploit this capability without exhaust-

ing the context budget, we textualize only the target window  $[s, e)$  after Z-score normalization of the full series  $\mathbf{x}_{1:T}$ . Values are scaled by a factor  $r$  (default  $r=100$ ) to preserve precision while avoiding decimal tokens (Liu et al., 2024b), rounded to integers, and serialized as a delimiter-separated string (e.g., “123, 124, 127, 128”) to constitute `{time_series_tokens}`. This pathway is compact—its position cost scales as  $\alpha(e - s) + c$  where  $\alpha$  is the average subword tokens per integer and  $c$  the delimiter overhead—yet it preserves step-wise numeric grounding.

**Context-Integrated Step-aligned Hint.** While the above textualization provides direct numeric access, it cannot capture long-range dependencies essential for TSAD such as regime shifts, seasonality interactions, and boundary effects. We therefore condense global information into step-aligned local representations via a pretrained time-series encoder and a *Hint Tuner*, in the spirit of (Jin et al., 2023). A Transformer encoder  $f_\theta$  consumes  $\mathbf{x}_{1:T}$  and outputs embeddings  $\mathbf{H}_{1:T} \in \mathbb{R}^{T \times d_{\text{proj}}}$  where  $d_{\text{proj}} = 256$  is the projection dimension (the details are shown in Appx. B.1). We slice  $\mathbf{H}_{s:e}$  and map it into the LLM space using a multi-head cross-attention mechanism over a prototype bank derived from the LLM vocabulary. **The prototype bank is defined as  $\mathbf{S}_{\text{proto}} = \mathbf{M}\mathbf{E}_{\text{vocab}} \in \mathbb{R}^{P \times d_h}$ , where  $\mathbf{E}_{\text{vocab}} \in \mathbb{R}^{|\mathcal{V}| \times d_h}$  denotes fixed word embeddings and  $\mathbf{M} \in \mathbb{R}^{P \times |\mathcal{V}|}$  is a learnable linear projection ( $P = 1024$ ). Specifically, we employ scaled dot-product attention with  $H_{\text{tuner}} = 8$  heads. The queries, keys, and values are computed as:  $\mathbf{Q} = \mathbf{H}_{s:e}\mathbf{W}_q$ ,  $\mathbf{K} = \mathbf{S}_{\text{proto}}$ ,  $\mathbf{V} = \mathbf{S}_{\text{proto}}$ , where  $\mathbf{W}_q \in \mathbb{R}^{d_{\text{proj}} \times d_h}$  projects the encoder output to the LLM hidden dimension ( $d_h = 4096$ ). The attention output is then:**

$$\tilde{\mathbf{H}}_{s:e} = \text{MultiHeadAttn}(\mathbf{Q}, \mathbf{K}, \mathbf{V}) \in \mathbb{R}^{(e-s) \times d_h}.$$

The resulting  $\tilde{\mathbf{H}}_{s:e}$  acts as step-aligned local hints that inject global context and temporal structure into the LLM embedding space while keeping both the LLM and  $f_\theta$  frozen. This pathway adds  $(e - s)$  positions linearly while supplying detailed global context and temporal alignment.

**Task-Prior Hint.** To regularize decoding and inject task-level priors that remain stable across instances, we introduce a small set of shared queries  $\mathbf{P}_{\text{fix}} \in \mathbb{R}^{K \times d_h}$  that attend to the same prototype source:  $\tilde{\mathbf{F}} = \text{Attn}(\mathbf{P}_{\text{fix}}, \mathbf{S}_{\text{proto}}, \mathbf{S}_{\text{proto}}) \in \mathbb{R}^{K \times d_h}$ .

**Final Prompt.** The three hint pathways are integrated into a unified prompt that conditions the frozen LLM, as illustrated in Fig. 3. The final input sequence is constructed from a template containing the user’s query  $q$ , the textualized window values, and special placeholder tokens. At input time, the embeddings for the  $K$  task-prior hints ( $\tilde{\mathbf{F}}$ ) and the  $(e - s)$  step-aligned hints ( $\tilde{\mathbf{H}}_{s:e}$ ) replace the embeddings of  $K + (e - s)$  placeholder tokens. The symbolic numeric hint is inserted directly as text. This process yields a single, coherent input sequence for the LLM that combines natural language with rich, multi-faceted temporal information, all without requiring architectural changes to the base model.

### 3.3 TRAINING OBJECTIVE

Our method is trained in two phases. First, we pretrain the time-series encoder  $f_\theta$  using a joint objective that combines masked reconstruction and anomaly classification to learn robust temporal representations. The total loss is defined as:

$$\mathcal{L}_{\text{pretrain}} = \lambda_{\text{recon}}\mathcal{L}_{\text{recon}} + \lambda_{\text{class}}\mathcal{L}_{\text{class}},$$

where  $\mathcal{L}_{\text{recon}}$  is the Mean Squared Error (MSE) over masked timesteps,  $\mathcal{L}_{\text{class}}$  is the Binary Cross-Entropy (BCE) loss, and we set  $\lambda_{\text{recon}} = 1.0$  and  $\lambda_{\text{class}} = 1.0$ .

In the second phase, we freeze both the encoder and the LLM, training only the Hint Tuner and its associated parameters ( $\mathbf{M}, \mathbf{P}_{\text{fix}}$ ). This phase optimizes a standard next-token prediction objective:

$$\mathcal{L}_{\text{LM}} = - \sum_{i=1}^N \log P(y_i | y_{<i}, q, \tilde{\mathbf{H}}_{s:e}, \tilde{\mathbf{F}}),$$

where  $\mathbf{y}$  is the target explanation sequence. **This two-phase strategy maintains computational efficiency by training only the lightweight Hint Tuner while preserving the time series encoder’s pre-trained capabilities. The decoupled design enables stable training by separating temporal representation learning from cross-modal alignment. The detailed training process and additional hyperparameters are given in Appx. B.2 and B.3 .**

### 3.4 A BENCHMARK FOR SEMANTIC TIME SERIES ANOMALY EXPLANATION

Existing methods reveal a foundational limitation: the community lacks a benchmark that teaches models to speak the language of temporal patterns. To address both the contextual grounding and representation alignment challenges outlined earlier, we synthesize a benchmark specifically designed to train models to reason about anomalies like human experts. Rather than a mere collection of time series, our benchmark constitutes a carefully curated curriculum built around three core design principles.

**Pattern-Level Anomaly Vocabulary.** To address the representation alignment challenge, we introduce a procedural engine that moves beyond abstract statistical deviations to a vocabulary of interpretable, pattern-level anomalies. As illustrated in Figure 4, our engine synthetically composes canonical anomaly primitives—such as *sudden spikes*, *level shifts*, and *periodicity breaks*—onto clean baseline series. A key advantage of our approach is the generation of **paired time series**: for every abnormal series created, a corresponding normal counterpart is preserved. This methodology establishes an unambiguous, verifiable link between anomaly time series and its linguistic label, forming the bedrock for teaching models to reason about the semantics of temporal events.

#### Contextual and Comparative Reasoning.

To overcome the contextual grounding challenge, we designed our benchmark to compel models to reason about local events within a global and comparative framework. Naively presenting isolated time-series windows is insufficient. Instead, our engine first generates a **global descriptor**, a textual summary of the series’ overall dynamics (e.g., trends, seasonality), which provides essential context. Second, we employ a comparative windowing strategy. A model is presented not only with a window containing a potential anomaly but also with the corresponding temporal window from its “healthy” paired series. This core design choice is a significant advantage, as it inherently frames the task as a discriminative one: the model must learn to articulate **why** a specific pattern deviates from an explicit, provided norm, rather than merely describing a segment in isolation.

#### LLM-Powered Explanation Generation.

Building on this structured foundation, we leverage LLMs to generate high-quality, multi-format supervision signals. As depicted in our pipeline, this is a multi-agent process. One LLM agent uses the global descriptor to formulate a targeted diagnostic question. A second, more powerful agent is then tasked with answering this question, conditioned on the global descriptor, the abnormal and normal window data. The primary motivation here is to generate rich, conceptual explanations. Our prompts are meticulously engineered to discourage superficial strategies (e.g., quoting raw values) and instead elicit reasoning based on the intrinsic, morphological characteristics of the anomaly. This process yields a diverse and consistent set of questions and detailed rationales, creating a powerful supervisory signal for training.

**Ensuring Benchmark Integrity.** To guarantee the scientific utility and integrity of our benchmark, we implement a rigorous quality control pipeline. This process verifies the agreement between ground-truth labels and generated answers, enforces stylistic consistency, and filters potential redundancies. We provide comprehensive dataset statistics and are releasing all generation metadata to ensure the full reproducibility of our benchmark. The detailed integrity check protocols are described in Appx. D. The result is not merely a dataset but a robust training environment engineered to finally bridge the semantic gap in time series anomaly explanation. Some examples of the generated Q&A pairs are given in Appx. C.2.

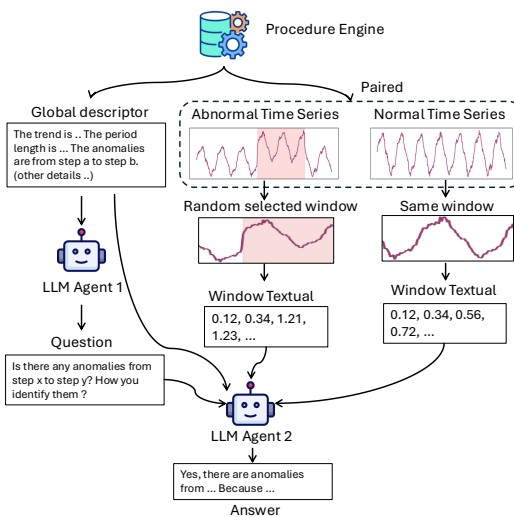

Figure 4: The architecture of our procedural engine for generating context-aware and comparative anomaly explanation benchmarks.

## 4 EXPERIMENTS

To validate the effectiveness of AXIS, we conduct a series of experiments designed to answer three central research questions: **RQ1: Explanation Quality.** How does AXIS compare against state-of-the-art LLM-based methods in generating high-quality, semantic anomaly explanations? **RQ2: Component Importance.** How do the core components of our framework—the symbolic numeric hint, the context-integrated step-aligned hint, and the task-prior hint—contribute to the final explanation quality? **RQ3: Architectural Generality.** How robust is the AXIS framework when applied to different underlying frozen LLMs? **RQ4: Generalization.** How well does AXIS generalize to external public datasets representing real-world scenarios? Finally, in Appx. B.2, we demonstrate that our Phase I TSAD model achieves results comparable to state-of-the-art methods on real-world public TSAD datasets.

### 4.1 EXPERIMENTAL SETUP

**Dataset.** All experiments are conducted on our newly created **Semantic Anomaly Benchmark** (detailed in Sec. 3.4 and Appx. F). This benchmark is specifically designed for the task of semantic time series anomaly explanation, containing diverse anomaly patterns, multi-format questions (Multiple Choice, True/False, Open-Ended), and detailed, pattern-level ground-truth explanations. The all hyperparameters for AXIS is given in Appx. B.3.

**Baselines.** We compare AXIS with a comprehensive set of strong baselines, categorized as follows: **Timeseries VLM:** (He et al., 2025) `Image LLM` is supported by `gpt-4o`, which analyzes plots of the full time series with highlighted window, treating the explanation task as a visual reasoning problem. **Specialized TS-LLM Methods:** We include several recent models designed for time series analysis with LLMs: `ChatTS` (Xie et al., 2024), `LLMAD` (Liu et al., 2025), `ChatTime` (Wang et al., 2025a), and `AnomLLM` (Dong et al., 2024). We evaluate `AnomLLM` in two settings: providing the full series (`AnomLLM(Full)`) and providing only the target window (`AnomLLM(Window)`). **Heuristic Baselines:** To contextualize benchmark difficulty, we introduce two non-learning baselines: (i) `Random Template`, which fills sophisticated-sounding templates with random values to test if the task is solvable by “hallucination”; and (ii) `Simple Heuristic`, a rule-based system using statistical thresholds (z-score, volatility) to flag anomalies.

**Evaluation Metrics.** Following recent work on evaluating LLM-generated content, we use an LLM-as-a-judge approach, specifically **G-eval** (Liu et al., 2023) with Gemini-2.5 as the arbiter. The quality of explanations is assessed across multiple dimensions tailored to each question type, including Correctness (Corr.), Reasoning Quality (Rsn. Qual.), Accuracy (Acc.), Completeness (Comp.), Relevance (Rel.), and Justification Quality (Justif.). A final, holistic score (Final) is also computed. The detailed definition for evaluation metrics is given in Appx. G

### 4.2 MAIN RESULTS: EXPLANATION QUALITY (RQ1)

Table 1 presents the main results comparing our model, AXIS, against all baselines. Our method demonstrates superior performance across all metrics and question types, establishing a new state-of-the-art for the task.

Specifically, AXIS achieves the highest final scores on Multiple Choice (4.19), Open-Ended (3.02), and True/False (3.65) questions. This consistent top-ranking performance highlights its robust ability to generate accurate, complete, and well-reasoned explanations regardless of the question format. Compared to specialized TS-LLM baselines like `ChatTS` and the `AnomLLM` variants, our method shows a significant improvement, underscoring the effectiveness of our proposed hint-based conditioning strategy. The strong performance against the `Image LLM` baseline further suggests that our multi-pathway representation provides richer, more aligned signals for the LLM than raw visual serialization.

**Visualization.** To qualitatively illustrate these performance gains, Fig. 5 presents a comparative case study. In the Fig. 5(a), the target window (steps 444 to 473) exhibits pronounced oscillations. AXIS correctly contextualizes these dynamics against the broader series, identifying them as part of a normal periodic pattern and concluding there is no anomaly. In stark contrast, a baseline like

Table 1: Main Results: AXIS vs Baselines

| Model                  | Multiple Choice |             |             | Open Ended  |             |             |             | True False  |             |             |
|------------------------|-----------------|-------------|-------------|-------------|-------------|-------------|-------------|-------------|-------------|-------------|
|                        | Final           | Corr.       | Rsn. Qual.  | Final       | Acc.        | Comp.       | Rel.        | Final       | Corr.       | Justif.     |
| <b>AXIS</b>            | <b>4.19</b>     | <b>4.21</b> | <b>4.14</b> | <b>3.02</b> | <b>2.87</b> | <b>2.93</b> | <b>3.31</b> | <b>3.65</b> | <b>3.60</b> | <b>3.74</b> |
| Image LLM              | 4.09            | 4.12        | 4.02        | 2.68        | 2.53        | 2.49        | 3.07        | 2.64        | 2.57        | 2.74        |
| ChatTS                 | 3.29            | 3.40        | 3.05        | 2.19        | 1.67        | 2.13        | 2.87        | 2.79        | 2.76        | 2.83        |
| LLMAD                  | 2.73            | 2.70        | 2.79        | 2.09        | 2.09        | 1.89        | 2.31        | 2.49        | 2.52        | 2.43        |
| ChatTime               | 1.33            | 1.49        | 0.98        | 0.96        | 0.95        | 0.98        | 0.95        | 1.04        | 1.07        | 1.00        |
| AnomLLM(Full)          | 3.13            | 2.98        | 3.49        | 2.86        | 2.53        | 2.89        | 3.20        | 2.88        | 2.60        | 3.31        |
| AnomLLM(Window)        | 3.78            | 3.81        | 3.70        | 2.84        | 2.78        | 2.55        | 3.24        | 3.32        | 3.45        | 3.12        |
| Baseline 1 (Random)    | 1.02            | 1.03        | 1.00        | 1.21        | 1.21        | 1.05        | 1.41        | 1.29        | 1.36        | 1.18        |
| Baseline 2 (Heuristic) | 2.44            | 2.81        | 1.58        | 1.72        | 1.98        | 1.15        | 2.07        | 2.64        | 2.74        | 2.50        |

Table 2: Ablation Studies of Hint Components

| Model            | Multiple Choice |             |             | Open Ended  |             |             |             | True False  |             |             |
|------------------|-----------------|-------------|-------------|-------------|-------------|-------------|-------------|-------------|-------------|-------------|
|                  | Final           | Corr.       | Rsn. Qual.  | Final       | Acc.        | Comp.       | Rel.        | Final       | Corr.       | Justif.     |
| <b>AXIS</b>      | <b>4.19</b>     | <b>4.21</b> | <b>4.14</b> | <b>3.02</b> | <b>2.87</b> | <b>2.93</b> | <b>3.31</b> | <b>3.65</b> | <b>3.60</b> | <b>3.74</b> |
| w/o-task-hint    | 3.82            | 3.93        | 3.56        | 2.33        | 2.13        | 2.22        | 2.69        | 3.25        | 3.31        | 3.17        |
| w/o-context-hint | 4.09            | 4.16        | 3.91        | 2.75        | 2.56        | 2.58        | 3.16        | 2.44        | 2.48        | 2.38        |
| w/o-windows      | 3.95            | 4.00        | 3.84        | 2.41        | 2.00        | 2.36        | 2.95        | 2.87        | 2.83        | 2.93        |

AnomLLM or ChatTS, when limited to the window view, lacks this broader context and erroneously flags the internal deviations as potential outliers. In Fig. 5(b), AXIS provides a precise characterization by explicitly identifying the brief increase at steps 6–7 (2.27, 1.73, 2.38) and correctly interpreting it as a transient fluctuation rather than a sustained anomaly, concluding that the pattern is stable and anomaly-free. In contrast, alternative approaches tend to give vague or generalized descriptions, often noting fluctuations or moderate oscillations without distinguishing whether they indicate normal behavior or anomalies. This comparison highlights that our representation alignment framework enables fine-grained, context-aware interpretation of time series behavior, avoiding ambiguous assessments and ensuring robust anomaly detection.

**Human evaluation.** To further validate these quantitative results from a human-centric perspective, we also performed a statistical analysis based on expert rankings of the model-generated explanations. We conducted a survey where human evaluators were asked to rank the outputs from all competing models for each question type. Fig. 6 corroborates the findings from Table 1. Note that ChatTime is excluded from this analysis as it exhibited fundamental task-comprehension failures (e.g., inability to parse prompts), rendering its outputs non-comparable. Our model, AXIS, consistently achieves the best (lowest) average rank across all three tasks, positioning it furthest to the right. The details for experiment setup and results are shown in Appx. H.

**Validity Check via Heuristic Baselines.** As shown in Table 1, Baseline 1 (Random) performs near the lower bound across all metrics (1.00–1.41), confirming that fabricated explanations fail. Baseline 2 (Heuristic) shows modest improvement but still lags significantly behind semantic models, particularly on reasoning quality (1.58 vs 4.14 for AXIS), demonstrating that rule-based systems cannot generate coherent explanations. The substantial gap between these baselines and AXIS validates that the benchmark effectively discriminates between trivial heuristics and genuine semantic reasoning.

### 4.3 ABLATION STUDIES (RQ2)

To understand the contribution of each component in AXIS, we conducted an ablation study, with results summarized in Table 2. The study confirms that all three input pathways are crucial for optimal performance. Removing the context-integrated step-aligned hint (‘w/o-context-hint’) degrades performance most severely on True/False questions (Final score drops from 3.65 to 2.44), confirming that binary judgments rely on precise, step-aligned temporal cues. In contrast, Open-Ended questions are most sensitive to the symbolic numeric hint from the window (‘w/o-windows’); without it, accuracy drops markedly (2.00 vs 2.87) and overall quality declines (Final 2.41 vs 3.02), indicating

432  
433  
434  
435  
436  
437  
438  
439  
440  
441  
442  
443  
444  
445  
446  
447  
448  
449  
450  
451  
452  
453  
454  
455  
456  
457  
458  
459  
460  
461  
462  
463  
464  
465  
466  
467  
468  
469  
470  
471  
472  
473  
474  
475  
476  
477  
478  
479  
480  
481  
482  
483  
484  
485

(a) Visualization for contextual grounding ability

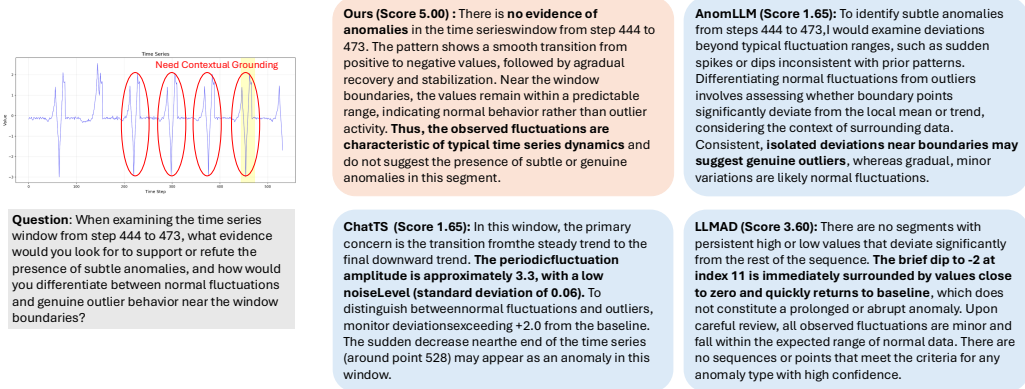

(b) Visualization for representation alignment ability

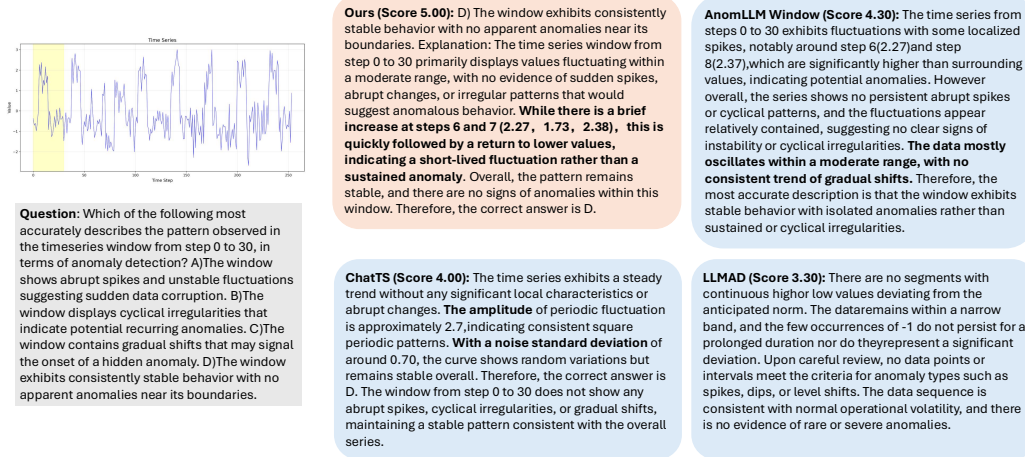

Figure 5: Visualization of (a) contextual grounding and (b) representation alignment ability

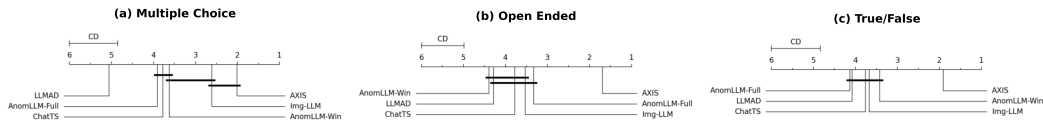

Figure 6: Critical Difference diagrams illustrating the statistical comparison of model performance based on human rankings for (a) Multiple Choice, (b) Open-Ended, and (c) True/False questions.

that direct numeric access provides the fine-grained grounding needed for detailed answers. Eliminating the task-prior hint ('w/o-task-hint') also substantially harms Open-Ended completeness and relevance (2.22/2.69 vs 2.93/3.31), suggesting that these global priors help structure the explanation and ensure comprehensive coverage. The full model consistently yields the best scores, validating our design choices. Additional experiments for causal contribution of hints are given in Appx. I.

#### 4.4 ANALYSIS OF ARCHITECTURAL VARIANTS (RQ3)

To assess its generality, we instantiated AXIS across multiple LLM families and settings, using a standardized *Family + Size + Variant* naming scheme and a fixed data schedule (R1) to isolate architectural effects. As shown in Table 3, our framework demonstrates robust cross-family adaptation (Qwen, Llama, Mistral) and its performance scales with model size (e.g., Qwen-14B > 7B > 1.5B). The results also reveal complementary strengths among model variants: code-pretrained models like *Qwen2.5-7B Coder* excel at structured discrimination tasks, achieving the highest Multiple Choice score (4.40), whereas instruction-tuned versions such as *Qwen2.5-7B Instruct* lead in free-form explanatory quality, with top scores in Open-Ended relevance and completeness (3.50/3.00). This

Table 3: AXIS variants across LLM families and settings (standardized naming: family + size + variant; *Instruct* denotes instruction-tuned, *Coder* denotes code-pretrained)

| Family         | Variant         | Multiple Choice |             |             | Open Ended  |             |             |             | True False  |             |             |
|----------------|-----------------|-----------------|-------------|-------------|-------------|-------------|-------------|-------------|-------------|-------------|-------------|
|                |                 | Final           | Corr.       | Rsn. Qual.  | Final       | Acc.        | Comp.       | Rel.        | Final       | Corr.       | Justif.     |
| Deepseek-Llama | 8B (Instruct)   | 4.28            | 4.30        | 4.23        | 3.02        | 2.84        | 2.84        | 3.45        | 3.64        | 3.55        | <b>3.79</b> |
| Deepseek-Qwen  | 14B (Instruct)  | 4.31            | 4.28        | 4.37        | 3.03        | 2.80        | 2.93        | 3.42        | 3.60        | 3.55        | 3.69        |
| Deepseek-Qwen  | 7B (Instruct)   | 4.19            | 4.21        | 4.14        | 3.02        | <b>2.87</b> | 2.93        | 3.31        | 3.65        | 3.60        | 3.74        |
| Deepseek-Qwen  | 1.5B (Instruct) | 4.07            | 4.12        | 3.95        | 2.72        | 2.65        | 2.55        | 3.00        | 3.18        | 3.17        | 3.19        |
| Qwen2.5        | 7B (Coder)      | <b>4.40</b>     | <b>4.40</b> | <b>4.42</b> | 2.72        | 2.64        | 2.58        | 2.98        | 2.96        | 2.98        | 2.93        |
| Qwen2.5        | 7B (Base)       | 4.30            | 4.37        | 4.12        | 2.75        | 2.73        | 2.45        | 3.13        | <b>3.66</b> | <b>3.69</b> | 3.62        |
| Qwen2.5        | 7B (Instruct)   | 4.17            | 4.22        | 4.06        | <b>3.08</b> | 2.80        | <b>3.00</b> | <b>3.50</b> | 3.11        | 3.00        | 3.27        |
| Mistral        | 7B (Base)       | 2.97            | 3.05        | 2.79        | 2.89        | 2.69        | 2.82        | 3.20        | 2.69        | 2.55        | 2.90        |
| Mistral        | 7B (Instruct)   | 3.36            | 3.33        | 3.44        | 2.77        | 2.58        | 2.45        | 3.35        | 3.27        | 3.17        | 3.43        |

Table 4: Performance comparison on Multiple Choice (MC) and True/False (TF) tasks.

| Dataset            | Metric   | AnomLLM     |      | LLMAD | ChatTS | AXIS 14B    | Image LLM   |
|--------------------|----------|-------------|------|-------|--------|-------------|-------------|
|                    |          | Window      | Full |       |        |             |             |
| YAHOO<br>(W=0.651) | MC Score | 2.78        | 1.69 | 2.48  | 2.83   | <b>3.07</b> | 2.80        |
|                    | MC Acc.  | 0.48        | 0.18 | 0.47  | 0.52   | <b>0.55</b> | 0.52        |
|                    | TF Score | 2.62        | 1.90 | 2.54  | 2.13   | <b>3.28</b> | 2.29        |
|                    | TF Acc.  | 0.53        | 0.38 | 0.51  | 0.45   | <b>0.67</b> | 0.52        |
| TODS<br>(W=0.672)  | MC Score | 2.07        | 1.77 | 2.33  | 2.67   | <b>2.90</b> | 2.53        |
|                    | MC Acc.  | 0.37        | 0.30 | 0.33  | 0.47   | <b>0.53</b> | 0.47        |
|                    | TF Score | 2.67        | 2.53 | 2.87  | 2.53   | <b>3.07</b> | 2.27        |
|                    | TF Acc.  | 0.53        | 0.52 | 0.58  | 0.53   | <b>0.62</b> | 0.50        |
| NEK<br>(W=0.713)   | MC Score | 3.31        | 1.94 | 1.44  | 3.06   | 3.25        | <b>3.41</b> |
|                    | MC Acc.  | <b>0.63</b> | 0.31 | 0.13  | 0.56   | <b>0.63</b> | <b>0.63</b> |
|                    | TF Score | 2.88        | 1.69 | 2.94  | 2.25   | <b>3.69</b> | 2.25        |
|                    | TF Acc.  | 0.56        | 0.35 | 0.59  | 0.47   | <b>0.74</b> | 0.50        |

highlights that AXIS not only universally enhances different base models but also allows for trade-offs between discriminative and explanatory objectives through strategic variant selection.

#### 4.5 GENERALIZATION TO PUBLIC REAL-WORLD DATASETS (RQ4)

To rigorously evaluate the generalization capability of AXIS beyond our synthetic benchmark, we extend our evaluation to established public datasets representing real-world operational scenarios. We construct a curated evaluation set derived from 108 time series sampled from three distinct sources: YAHOO, TODS, and NEK (details in Appendix H.3). We formulate two specific tasks—True/False and Multiple-Choice Questions—and employed expert annotation to establish high-quality ground truth, ensuring a robust testbed for real-world explanation quality.

The results, summarized in Table 4, demonstrate that AXIS consistently delivers superior explanation quality across these diverse domains. Our model achieves the highest scores in both MC and TF categories on the YAHOO and TODS datasets, and leads in TF performance on NEK. Notably, the strong inter-rater agreement (Kendall’s  $W > 0.65$ ) across all datasets confirms the reliability of our human evaluation. These findings validate that AXIS effectively generalizes to real-world data distributions, bridging the gap between synthetic training and practical operational deployment.

## 5 CONCLUSION

We introduce a novel cross-modal framework that effectively adapts frozen Large Language Models for semantic time series anomaly explanation. By using a three-stream conditioning strategy that combines a symbolic numeric hint, a context-integrated step-aligned hint, and a task-prior hint, our method achieves strong performance in both detection accuracy and explanation quality. Future work will explore incorporating domain-specific knowledge graphs to enhance causal reasoning and generating multi-modal explanations that include visualizations alongside text.

## ETHICS STATEMENT

This work focuses on explainable time series anomaly detection and does not involve personally identifiable information or other sensitive attributes. Our benchmark primarily uses procedurally synthesized data and publicly available datasets; no private logs are collected, and no re-identification is attempted. Human evaluation was conducted with informed consent, anonymized responses, and fair compensation in line with institutional guidelines, without storing any personally identifying information.

## REPRODUCIBILITY STATEMENT

We aim for full reproducibility. Upon publication, we will release code, configuration files, and scripts to reproduce: (i) the benchmark synthesis pipeline (including prompts, fixed random seeds, and parameter settings); (ii) Phase I encoder pretraining and Phase II hint tuning with exact hyperparameters, token budgets, and training schedules (see Appendix B.2 and Appendix B.3); and (iii) evaluation pipelines, including baseline configurations, G-Eval judge prompts, scoring scripts, and human-evaluation materials. We will provide model checkpoints where licensing permits or otherwise specify exact model identifiers and initialization procedures. The code is available in <https://anonymous.4open.science/r/TimeSemantic-1742/main.py>

## REFERENCES

- Sarah Alnegheimish, Linh Nguyen, Laure Berti-Equille, and Kalyan Veeramachaneni. Can large language models be anomaly detectors for time series? In *2024 IEEE 11th International Conference on Data Science and Advanced Analytics (DSAA)*, pp. 1–10. IEEE, 2024.
- Abdul Fatir Ansari, Lorenzo Stella, Caner Turkmen, Xiyuan Zhang, Pedro Mercado, Huibin Shen, Oleksandr Shchur, Syama Sundar Rangapuram, Sebastian Pineda Arango, Shubham Kapoor, et al. Chronos: Learning the language of time series. *arXiv preprint arXiv:2403.07815*, 2024.
- Julien Audibert, Pietro Michiardi, Frédéric Guyard, Sébastien Marti, and Maria A Zuluaga. Usad: Unsupervised anomaly detection on multivariate time series. In *Proceedings of the 26th ACM SIGKDD international conference on knowledge discovery & data mining*, pp. 3395–3404, 2020.
- Omar Bahri, Soukaina Filali Boubrahimi, and Shah Muhammad Hamdi. Shapelet-based counterfactual explanations for multivariate time series. *arXiv preprint arXiv:2208.10462*, 2022.
- João Bento, Pedro Saleiro, André F Cruz, Mário AT Figueiredo, and Pedro Bizarro. Timeshap: Explaining recurrent models through sequence perturbations. In *Proceedings of the 27th ACM SIGKDD conference on knowledge discovery & data mining*, pp. 2565–2573, 2021.
- Markus M Breunig, Hans-Peter Kriegel, Raymond T Ng, and Jörg Sander. Lof: identifying density-based local outliers. In *Proceedings of the 2000 ACM SIGMOD international conference on Management of data*, pp. 93–104, 2000.
- Yifu Cai, Arjun Choudhry, Mononito Goswami, and Artur Dubrawski. Timeseriesexam: A time series understanding exam. *arXiv preprint arXiv:2410.14752*, 2024.
- Yifu Cai, Xinyu Li, Mononito Goswami, Michał Wiliński, Gus Welter, and Artur Dubrawski. Timeseriesgym: A scalable benchmark for (time series) machine learning engineering agents. *arXiv preprint arXiv:2505.13291*, 2025.
- Jialin Chen, Aosong Feng, Ziyu Zhao, Juan Garza, Gaukhar Nurbek, Cheng Qin, Ali Maatouk, Leandros Tassioulas, Yifeng Gao, and Rex Ying. Mtbench: A multimodal time series benchmark for temporal reasoning and question answering. *arXiv preprint arXiv:2503.16858*, 2025.
- Abhimanyu Das, Weihao Kong, Rajat Sen, and Yichen Zhou. A decoder-only foundation model for time-series forecasting. In *Forty-first International Conference on Machine Learning*, 2024.
- Manqing Dong, Hao Huang, and Longbing Cao. Can llms serve as time series anomaly detectors? *arXiv preprint arXiv:2408.03475*, 2024.

- 594 Vijay Ekambaram, Subodh Kumar, Arindam Jati, Sumanta Mukherjee, Tomoya Sakai, Pankaj  
595 Dayama, Wesley M Gifford, and Jayant Kalagnanam. Tspulse: Dual space tiny pre-trained mod-  
596 els for rapid time-series analysis. *arXiv preprint arXiv:2505.13033*, 2025.
- 597  
598 Shanghua Gao, Teddy Koker, Owen Queen, Tom Hartvigsen, Theodoros Tsiligkaridis, and Marinka  
599 Zitnik. Units: A unified multi-task time series model. *Advances in Neural Information Processing*  
600 *Systems*, 37:140589–140631, 2024.
- 601 Mononito Goswami, Konrad Szafer, Arjun Choudhry, Yifu Cai, Shuo Li, and Artur Dubrawski.  
602 Moment: A family of open time-series foundation models. *arXiv preprint arXiv:2402.03885*,  
603 2024.
- 604 Zelin He, Sarah Alnegheimish, and Matthew Reimherr. Harnessing vision-language models for time  
605 series anomaly detection. *arXiv preprint arXiv:2506.06836*, 2025.
- 606  
607 Kyle Hundman, Valentino Constantinou, Christopher Laporte, Ian Colwell, and Tom Soderstrom.  
608 Detecting spacecraft anomalies using lstms and nonparametric dynamic thresholding. In *Pro-*  
609 *ceedings of the 24th ACM SIGKDD international conference on knowledge discovery & data*  
610 *mining*, pp. 387–395, 2018.
- 611 Rahat Iqbal, Tomasz Maniak, Faiyaz Doctor, and Charalampos Karyotis. Fault detection and iso-  
612 lation in industrial processes using deep learning approaches. *IEEE Transactions on Industrial*  
613 *Informatics*, 15(5):3077–3084, 2019.
- 614 Ming Jin, Shiyu Wang, Lintao Ma, Zhixuan Chu, James Y Zhang, Xiaoming Shi, Pin-Yu Chen, Yux-  
615 uan Liang, Yuan-Fang Li, Shirui Pan, et al. Time-llm: Time series forecasting by reprogramming  
616 large language models. *arXiv preprint arXiv:2310.01728*, 2023.
- 617 Kai Kim, Howard Tsai, Rajat Sen, Abhimanyu Das, Zihao Zhou, Abhishek Tanpure, Mathew Luo,  
618 and Rose Yu. Multi-modal forecaster: Jointly predicting time series and textual data. *arXiv*  
619 *preprint arXiv:2411.06735*, 2024.
- 620  
621 Yaxuan Kong, Yiyuan Yang, Yoontae Hwang, Wenjie Du, Stefan Zohren, Zhangyang Wang, Ming  
622 Jin, and Qingsong Wen. Time-mqa: Time series multi-task question answering with context  
623 enhancement. *arXiv preprint arXiv:2503.01875*, 2025.
- 624 Tian Lan, Yifei Gao, Yimeng Lu, and Chen Zhang. Cicada: Cross-domain interpretable coding for  
625 anomaly detection and adaptation in multivariate time series. *arXiv preprint arXiv:2505.00415*,  
626 2025.
- 627  
628 Minhua Lin, Zhengzhang Chen, Yanchi Liu, Xujiang Zhao, Zongyu Wu, Junxiang Wang, Xiang  
629 Zhang, Suhang Wang, and Haifeng Chen. Decoding time series with llms: A multi-agent frame-  
630 work for cross-domain annotation. *arXiv preprint arXiv:2410.17462*, 2024.
- 631 Fei Tony Liu, Kai Ming Ting, and Zhi-Hua Zhou. Isolation forest. In *2008 eighth ieee international*  
632 *conference on data mining*, pp. 413–422. IEEE, 2008.
- 633  
634 Haoxin Liu, Shangqing Xu, Zhiyuan Zhao, Lingkai Kong, Harshavardhan Prabhakar Kamarthi,  
635 Aditya Sasanur, Megha Sharma, Jiaming Cui, Qingsong Wen, Chao Zhang, et al. Time-mmd:  
636 Multi-domain multimodal dataset for time series analysis. *Advances in Neural Information Pro-*  
637 *cessing Systems*, 37:77888–77933, 2024a.
- 638 Jun Liu, Chaoyun Zhang, Jiayu Qian, Minghua Ma, Si Qin, Chetan Bansal, Qingwei Lin, Saravan  
639 Rajmohan, and Dongmei Zhang. Large language models can deliver accurate and interpretable  
640 time series anomaly detection. In *Proceedings of the 31st ACM SIGKDD Conference on Knowl-*  
641 *edge Discovery and Data Mining V. 2*, pp. 4623–4634, 2025.
- 642  
643 Qingxiang Liu, Xu Liu, Chenghao Liu, Qingsong Wen, and Yuxuan Liang. Time-ffm: Towards  
644 lm-empowered federated foundation model for time series forecasting. *Advances in Neural Infor-*  
645 *mation Processing Systems*, 37:94512–94538, 2024b.
- 646 Yang Liu, Dan Iter, Yichong Xu, Shuohang Wang, Ruochen Xu, and Chenguang Zhu. G-eval: Nlg  
647 evaluation using gpt-4 with better human alignment. *arXiv preprint arXiv:2303.16634*, 2023.

- 648 Lifeng Shen, Zhuocong Li, and James Kwok. Timeseries anomaly detection using temporal hierar-  
649 chical one-class network. *Advances in neural information processing systems*, 33:13016–13026,  
650 2020.
- 651 Qichao Shentu, Beibu Li, Kai Zhao, Yang Shu, Zhongwen Rao, Lujia Pan, Bin Yang, and Chen-  
652 juan Guo. Towards a general time series anomaly detector with adaptive bottlenecks and dual  
653 adversarial decoders. *arXiv preprint arXiv:2405.15273*, 2024.
- 654 Ya Su, Youjian Zhao, Chenhao Niu, Rong Liu, Wei Sun, and Dan Pei. Robust anomaly detection for  
655 multivariate time series through stochastic recurrent neural network. In *Proceedings of the 25th  
656 ACM SIGKDD international conference on knowledge discovery & data mining*, pp. 2828–2837,  
657 2019.
- 658 Shreshth Tuli, Giuliano Casale, and Nicholas R Jennings. Tranad: deep transformer networks for  
659 anomaly detection in multivariate time series data. *Proceedings of the VLDB Endowment*, 15(6):  
660 1201–1214, 2022.
- 661 Chengsen Wang, Qi Qi, Jingyu Wang, Haifeng Sun, Zirui Zhuang, Jinming Wu, Lei Zhang, and  
662 Jianxin Liao. Chattime: A unified multimodal time series foundation model bridging numerical  
663 and textual data. In *Proceedings of the AAAI Conference on Artificial Intelligence*, volume 39,  
664 pp. 12694–12702, 2025a.
- 665 Tao Wang, Cong Zhang, Xingguang Qu, Kun Li, Weiwei Liu, and Chang Huang. Diffad: A unified  
666 diffusion modeling approach for autonomous driving. *arXiv preprint arXiv:2503.12170*, 2025b.
- 667 Andrew Robert Williams, Arjun Ashok, Étienne Marcotte, Valentina Zantedeschi, Jithendaraa Sub-  
668 ramanian, Roland Riachi, James Requeima, Alexandre Lacoste, Irina Rish, Nicolas Chapados,  
669 et al. Context is key: A benchmark for forecasting with essential textual information. *arXiv  
670 preprint arXiv:2410.18959*, 2024.
- 671 Gerald Woo, Chenghao Liu, Akshat Kumar, Caiming Xiong, Silvio Savarese, and Doyen Sahoo.  
672 Unified training of universal time series forecasting transformers. 2024.
- 673 Shi Xiaoming, Wang Shiyu, Nie Yuqi, Li Dianqi, Ye Zhou, Wen Qingsong, and Ming Jin. Time-  
674 moe: Billion-scale time series foundation models with mixture of experts. In *ICLR 2025: The  
675 Thirteenth International Conference on Learning Representations*. International Conference on  
676 Learning Representations, 2025.
- 677 Zhe Xie, Zeyan Li, Xiao He, Longlong Xu, Xidao Wen, Tieying Zhang, Jianjun Chen, Rui Shi, and  
678 Dan Pei. Chatts: Aligning time series with llms via synthetic data for enhanced understanding  
679 and reasoning. *arXiv preprint arXiv:2412.03104*, 2024.
- 680 Jiehui Xu, Haixu Wu, Jianmin Wang, and Mingsheng Long. Anomaly transformer: Time series  
681 anomaly detection with association discrepancy. *arXiv preprint arXiv:2110.02642*, 2021.
- 682 Yiyuan Yang, Chaoli Zhang, Tian Zhou, Qingsong Wen, and Liang Sun. Dcdetector: Dual attention  
683 contrastive representation learning for time series anomaly detection. In *Proceedings of the 29th  
684 ACM SIGKDD conference on knowledge discovery and data mining*, pp. 3033–3045, 2023.
- 685 Chin-Chia Michael Yeh, Yan Zhu, Liudmila Ulanova, Nurjahan Begum, Yifei Ding, Hoang Anh  
686 Dau, Diego Furtado Silva, Abdullah Mueen, and Eamonn Keogh. Matrix profile i: all pairs  
687 similarity joins for time series: a unifying view that includes motifs, discords and shapelets. In  
688 *2016 IEEE 16th international conference on data mining (ICDM)*, pp. 1317–1322. Ieee, 2016.
- 689 Vannel Zeufack, Donghyun Kim, Daehee Seo, and Ahyoung Lee. An unsupervised anomaly detec-  
690 tion framework for detecting anomalies in real time through network system’s log files analysis.  
691 *High-Confidence Computing*, 1(2):100030, 2021.
- 692 Chuxu Zhang, Dongjin Song, Yuncong Chen, Xinyang Feng, Cristian Lumezanu, Wei Cheng,  
693 Jingchao Ni, Bo Zong, Haifeng Chen, and Nitesh V Chawla. A deep neural network for un-  
694 supervised anomaly detection and diagnosis in multivariate time series data. In *Proceedings of  
695 the AAAI conference on artificial intelligence*, volume 33, pp. 1409–1416, 2019.
- 696 Zihao Zhou and Rose Yu. Can llms understand time series anomalies? *arXiv preprint  
697 arXiv:2410.05440*, 2024.

## 702 A USE OF LLMs

703  
704 Our manuscript preparation involved the use of large language models (LLMs) primarily for refining  
705 language, improving grammar, readability, and stylistic elements. Crucially, LLMs also constituted  
706 a core component of our research process. They were leveraged as agents to participate in data gen-  
707 eration, established as benchmarks for experimental baselines, and contributed to the comprehensive  
708 evaluation of experimental results. For a detailed account of LLMs’ specific applications within our  
709 methodology, please refer to Section 3.4 and Section 4. We confirm that the contributions of LLMs,  
710 whether in writing or research, do not impede the reproducibility of our reported findings.

## 712 B DETAILS FOR AXIS

### 713 B.1 TIME-SERIES ENCODER DETAILS

714 This section details the architecture of the time-series encoder  $f_\theta$  used in AXIS. The overall structure  
715 is shown in Fig. 7.

716 **Patchify.** Let  $P$  denote the patch size. We pad  $\mathbf{x}_{1:T}$  to length  
717  $T' = \lceil T/P \rceil P$  with zeros and form  $N = T'/P$  contiguous, non-  
718 overlapping patches:

$$719 \mathbf{X}^{(n)} = [x_{(n-1)P+1}, \dots, x_{nP}] \in \mathbb{R}^P, \quad n = 1, \dots, N.$$

720 Stacking yields  $\mathbf{X}_p \in \mathbb{R}^{N \times P}$ . The patch-level attention mask is  
721 obtained by aggregating the step mask: a patch is valid if it contains  
722 at least one valid step,

$$723 \mathbf{m}_n^{\text{patch}} = \mathbb{I}\left(\sum_{t=(n-1)P+1}^{nP} m_t > 0\right), \quad n = 1, \dots, N.$$

724 **Patch Embedding.** Each patch is projected to the model dimen-  
725 sion  $d_{\text{model}}$  with a linear layer

$$726 \mathbf{Z} = \mathbf{X}_p \mathbf{W}_e + \mathbf{1} \mathbf{b}_e^\top \in \mathbb{R}^{N \times d_{\text{model}}}, \quad \mathbf{W}_e \in \mathbb{R}^{P \times d_{\text{model}}}.$$

727 **Positional Encoding via RoPE.** The encoder uses rotary posi-  
728 tional encoding (RoPE) applied *inside* self-attention to the query  
729 and key of each head. Concretely, for a sequence of  $N$  patch to-  
730 kens, RoPE generates frequency pairs that rotate the  $d_{\text{model}}$  channels  
731 in 2D subspaces, providing translation-friendly relative position information.

732 **Transformer Encoder (Non-causal).** We stack  $L$  pre-norm Transformer encoder layers. Each  
733 layer comprises: (i) multi-head self-attention with  $H$  heads and head dimension  $d_{\text{head}} = d_{\text{model}}/H$ ;  
734 (ii) an MLP block of the LLaMA style with gated GELU activation. RMSNorm is used before  
735 attention and MLP. Attention is *non-causal* and operates over all  $N$  patches, enabling global context  
736 aggregation. The attention mask derived from  $\mathbf{m}^{\text{patch}}$  prevents padded tokens from contributing. In  
737 the univariate case there is no inter-feature bias term; the attention is standard scaled dot-product  
738 with RoPE.

739 **UnPatchify and Projection to Step Alignment.** The encoder output  $\mathbf{U} \in \mathbb{R}^{N \times d_{\text{model}}}$  is mapped to  
740 a patch-level representation of size  $P \times d_{\text{proj}}$  through a linear projection

$$741 \mathbf{Y} = \mathbf{U} \mathbf{W}_p \in \mathbb{R}^{N \times (P d_{\text{proj}})}, \quad \mathbf{W}_p \in \mathbb{R}^{d_{\text{model}} \times (P d_{\text{proj}})}.$$

742 Reshaping and reordering yield step-aligned embeddings  $\tilde{\mathbf{H}} \in \mathbb{R}^{T' \times d_{\text{proj}}}$ . We finally drop the padded  
743 tail to obtain

$$744 \mathbf{H}_{1:T} = \tilde{\mathbf{H}}_{1:T} \in \mathbb{R}^{T \times d_{\text{proj}}}.$$

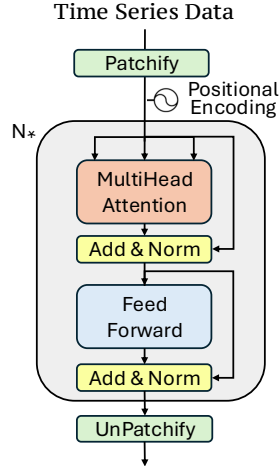

745 Figure 7: The structure of time-series encoder.

## B.2 TRAINING PROCESS DETAILS

Our model is trained in a two-phase process designed to first build a robust time-series representation and then align it with the frozen LLM’s semantic space.

### B.2.1 PHASE I: TIME-SERIES ENCODER PRETRAINING

In the first phase, we pretrain the time-series encoder  $f_\theta$  to learn a versatile representation of temporal dynamics. This is achieved by optimizing a joint objective function that combines masked reconstruction and anomaly classification. The encoder is a Transformer-based architecture that processes the entire input time series  $\mathbf{x}_{1:T}$ .

**Masked Reconstruction.** Following the principles of self-supervised learning for sequential data, we employ a masked reconstruction objective. A portion of the input time series is randomly masked, and the encoder is tasked with reconstructing the masked values. Let  $\mathbf{x}$  be the input series and  $\mathbf{m}$  be a binary mask where  $m_i = 1$  if the  $i$ -th timestep is masked and 0 otherwise. The encoder  $f_\theta$ , followed by a reconstruction head  $g_\psi$ , outputs a reconstructed series

$$\hat{\mathbf{x}} = g_\psi(f_\theta(\mathbf{x} \odot (\mathbf{1} - \mathbf{m}))).$$

The reconstruction loss is the Mean Squared Error (MSE) over the masked timesteps:

$$\mathcal{L}_{\text{recon}} = \frac{1}{\sum_i m_i} \sum_{i=1}^T m_i (x_i - \hat{x}_i)^2.$$

This objective forces the encoder to learn the underlying patterns and dependencies within the time series.

**Anomaly Classification.** To explicitly teach the encoder to distinguish between normal and anomalous patterns. Given a time series  $\mathbf{x}$  and its corresponding binary anomaly label  $\mathbf{l} \in \{0, 1\}^T$ , the model predicts the probability of an anomaly  $\hat{l}_t = h_\zeta(f_\theta(\mathbf{x}))$ . We use the BCE loss:

$$\mathcal{L}_{\text{class}} = - \sum_{t=1}^T (l_t \log(\hat{l}_t) + (1 - l_t) \log(1 - \hat{l}_t)).$$

**Joint Objective.** The total loss for the pretraining phase is a weighted sum of the reconstruction and classification losses:

$$\mathcal{L}_{\text{pretrain}} = \lambda_{\text{recon}} \mathcal{L}_{\text{recon}} + \lambda_{\text{class}} \mathcal{L}_{\text{class}},$$

where  $\lambda_{\text{recon}}$  and  $\lambda_{\text{class}}$  are hyperparameters that balance the two objectives. After this phase, the weights of the encoder  $f_\theta$  are frozen (only  $f_\theta$  is retained for the next phase).

### B.2.2 PHASE II: HINT TUNER TRAINING

In the second phase, we focus on aligning the pretrained time-series representations with the LLM. Both the time-series encoder  $f_\theta$  and the LLM are kept frozen to maintain their powerful, pre-existing capabilities. The only trainable components are the Hint Tuner and its associated parameters, namely the prototype bank selection matrix  $\mathbf{M}$  and the learnable task-prior queries  $\mathbf{P}_{\text{fix}}$ .

The goal of this phase is to train the model to generate a natural language explanation  $\mathbf{y} = (y_1, y_2, \dots, y_N)$  conditioned on the time series  $\mathbf{x}$ , the query  $q$ , and the derived hints. The training objective is a standard causal language modeling loss, which maximizes the likelihood of the ground-truth explanation.

Specifically, the input to the LLM is constructed by embedding the query  $q$ , the symbolic-numeric hint, and replacing placeholder token embeddings with the outputs of the Hint Tuner ( $\tilde{\mathbf{H}}_{s:e}$  and  $\tilde{\mathbf{F}}$ ). Here,  $s$  and  $e$  denote the start and end indices of the selected window within the full series  $\mathbf{x}_{1:T}$ . The model then autoregressively predicts the next token in the explanation sequence. The loss function is the negative log-likelihood of the target sequence:

$$\mathcal{L}_{\text{LM}} = - \sum_{i=1}^N \log P(y_i | y_{<i}, q, \tilde{\mathbf{H}}_{s:e}, \tilde{\mathbf{F}}).$$

By optimizing this objective, the Hint Tuner learns to map temporal features from the frozen encoder into meaningful "soft prompts" that effectively guide the frozen LLM to generate accurate and relevant explanations for the given time-series window. During this phase, gradients update only the Hint Tuner and its associated parameters ( $\mathbf{M}$  and  $\mathbf{P}_{\text{fix}}$ ); both  $f_\theta$  and all LLM parameters remain frozen.

### B.3 AXIS HYPERPARAMETER CONFIGURATION

This section provides a comprehensive specification of the hyperparameter configuration used in our AXIS framework. The architecture consists of two primary components: the time-series encoder and the hint tuner, each with distinct parameter settings optimized through systematic ablation studies.

**Time-Series Encoder Configuration.** The time-series encoder  $f_\theta$  employs a Transformer-based architecture with patch-based tokenization. The patch size  $P$  is set to 16, enabling efficient processing of long sequences while preserving temporal granularity. The encoder utilizes  $L = 6$  transformer layers, each with a model dimension  $d_{\text{model}} = 512$  and  $H = 8$  attention heads, resulting in a head dimension  $d_{\text{head}} = 64$ . The projection dimension  $d_{\text{proj}}$  is configured to 256.

**Hint Tuner Architecture.** The Perceiver-based hint tuner serves as the cross-modal alignment module between time-series representations and the frozen LLM embedding space. The prototype bank consists of  $P = 1024$  prototype embeddings derived from the LLM vocabulary through a learned linear mapping. The number of fixed task-prior tokens  $K$  is set to 8, providing sufficient capacity for global task-level priors while maintaining computational efficiency. The cross-attention mechanism within the hint tuner employs 8 attention heads, matching the encoder configuration for architectural consistency.

**Language Model Integration.** Our framework supports multiple LLM families with varying parameter scales. The experiments primarily utilize Qwen2.5-7B-Instruct as the base model, with the hidden dimension  $d_h = 4096$  for the 7B variant. The vocabulary size varies by model family, typically ranging from 32,000 to 152,000 tokens. Special tokens `<|local_hint|>` and `<|fixed_hint|>` are added to the vocabulary for hint injection, with corresponding token IDs dynamically assigned during initialization.

**Training Configuration.** The two-phase training procedure employs distinct hyperparameter settings for each phase. During Phase I (encoder pretraining), the reconstruction loss weight  $\lambda_{\text{recon}}$  and classification loss weight  $\lambda_{\text{class}}$  are both set to 1.0, providing balanced supervision across objectives. The masking ratio for reconstruction is configured to 0.25, following established practices in self-supervised time-series learning. Phase II (hint tuner training) utilizes standard causal language modeling with a learning rate of  $2 \times 10^{-4}$  and weight decay of 0.01, applied exclusively to the trainable parameters of the hint tuner and prototype bank.

**Inference Parameters.** During generation, the model employs beam search with 5 beams and a repetition penalty of 1.15 to ensure diverse and coherent explanations. The maximum generation length is capped at 1000 tokens to accommodate detailed explanations while preventing excessive verbosity. No-repeat n-gram size is set to 3 to avoid repetitive patterns, and length penalty is maintained at 1.0 to balance explanation completeness with conciseness.

## C PROMPT TEMPLATES AND Q&A EXEMPLARS

### C.1 PROMPT TEMPLATES

#### C.1.1 QUESTION GENERATION PROMPT

```
System: You generate precise and relevant questions for time series
        anomaly detection.
```

```
User:
```

864 Generate a {question\_type} question focused on anomaly detection for the  
 865 window [ {window\_start}, {window\_end} ].  
 866  
 867 Context:  
 868 - Task: time series anomaly detection on a windowed segment  
 869 - The window {may / does} contain anomalies: {has\_anomaly}  
 870 - Canonical tag (if available): {canonical\_tag}  
 871 - Global information: {global\_information}

872 Requirements:  
 873 1) Output ONLY the question text (no answers, no explanations).  
 874 2) Focus on anomaly identification and pattern analysis within the window  
 875 .  
 876 3) Consider boundary effects near window edges.  
 877 4) Multiple choice (if applicable):  
 878 - Provide exactly 4 options (A, B, C, D).  
 879 - Options must be mutually exclusive, same style.  
 880 - Include both normal and anomalous descriptions; avoid exact numeric  
 881 values.  
 882 5) True/False (if applicable):  
 883 - Make a specific statement about a potential anomaly pattern.  
 884 6) Open-ended (if applicable):  
 885 - Ask about pattern evidence and reasoning for/against anomalies.

### 886 C.1.2 ANSWER GENERATION PROMPT

887 System: You analyze time series patterns and generate concise answers.  
 888  
 889 User:  
 890 You are given a time series window [ {window\_start}, {window\_end} ],  
 891 which belongs to a longer series.  
 892 Global information: {global\_information}  
 893 Canonical tag (if available): {canonical\_tag}  
 894 Anomaly description (if any): {anomaly\_description}  
 895 Data [current\_value(normal\_value)]: [{data\_str}]  
 896 Question: {question}

897 Constraints:  
 898 - Focus on the pattern of current\_values; avoid relying on normal\_values.  
 899 - Keep the answer concise (<= 150 words), pattern-first (e.g., sustained  
 900 level change, volatility burst).  
 901 - MCQ: start with the correct option letter, then explanation (e.g., "B  
 902 ...").  
 903 - True/False: start with "True" or "False", then explanation.  
 904 - Do not quote exact numeric values; reason from shape, persistence,  
 905 variability.  
 906 - If no anomaly, state it clearly with supporting evidence.

## 907 C.2 Q&A EXEMPLARS

### 908 C.2.1 MULTIPLE CHOICE

911 Type: multiple\_choice  
 912 Window: [668, 707]  
 913 Has anomaly: false  
 914 Anomaly descriptions: []

915 Question:  
 916 Which of the following best describes the anomaly detection results for  
 917 the time series window from step 668 to 707?

- 918 A) The window contains a sudden spike suggesting an isolated anomaly near  
919 its center.  
920 B) The window shows a consistent pattern without any signs of anomalous  
921 behavior.  
922 C) The window includes a gradual drift at the boundary, indicating a  
923 possible transition to an anomaly.  
924 D) The window exhibits irregular fluctuations that are characteristic of  
925 multiple overlapping anomalies.

926 Answer:

- 927 B) The window shows a consistent pattern without any signs of anomalous  
928 behavior.  
929 The time series window from step 668 to 707 displays a steady, gradual  
930 decrease in values, with each step typically dropping by 0.01 or  
931 remaining constant for a brief interval before continuing the gradual  
932 trend. There are no sudden spikes, irregular fluctuations, or abrupt  
933 changes that would indicate an anomaly. The pattern is smooth and  
934 consistent throughout the window, suggesting stable behavior and the  
935 absence of any anomalous events within this interval.

### 936 C.2.2 TRUE/FALSE

938 Type: true\_false  
939 Window: [418, 458]  
940 Has anomaly: true  
941 Anomaly descriptions:  
942 ["A local continuous upward spike anomaly, featuring 5 consecutive spikes  
943 with amplitudes from 3.03 to 5.93"]

944 Question:

945 True or False: The presence of a cluster of consecutive upward spikes  
946 within the window from step 418 to 458 suggests an anomalous  
947 deviation from the expected time series pattern.

948 Answer:

949 True. Within the window from step 418 to 458, there is a cluster of  
950 consecutive upward spikes—specifically, a sequence of five elevated  
951 values (2.26, 2.05, 2.05, 2.05, 0.71) that stand out sharply against  
952 the otherwise stable and low baseline pattern (around 0.7). This  
953 sudden, localized series of spikes deviates significantly from the  
954 expected behavior of the time series, which is generally flat and  
955 consistent. The presence of these consecutive upward anomalies  
956 suggests a notable and abrupt deviation from the normal pattern,  
957 indicating an anomalous event within this segment of the data.

### 958 C.2.3 OPEN-ENDED

960 Type: open\_ended  
961 Window: [294, 311]  
962 Has anomaly: false  
963 Anomaly descriptions: []

964 Question:

965 How would you assess the presence or absence of anomalies in the time  
966 series window from step 294 to 311, and what evidence from the data  
967 supports your conclusion regarding the normality or abnormality of  
968 this segment?

969 Answer:

970 There is no evidence of anomalies in the time series window from step 294  
971 to 311. The values show a gradual decrease from 0.88 to 0.62,  
followed by a mild recovery back up to 0.73. This pattern reflects a

smooth and consistent trend without sudden spikes, abrupt drops, or irregular fluctuations. The transitions between values are steady and do not indicate any unusual or unexpected behavior. Overall, the segment demonstrates normal and stable behavior within the observed window.

## D BENCHMARK INTEGRITY CHECK PROTOCOLS

To ensure the scientific validity and reproducibility of our benchmark, we implemented a rigorous three-stage automated filtering pipeline to identify and remove low-quality or biased samples.

**1. Label Consistency Check.** This step ensures that the semantic explanation aligns with the ground-truth anomaly label. We parse the generated answer to extract the definitive judgment (e.g., "Yes, there is an anomaly" or "No anomaly detected"). We then compare this judgment against the procedural injection log. If the generator claims an anomaly exists in a window that the procedural engine marked as normal (or vice versa), the sample is discarded. This eliminates "hallucinated" anomalies where the LLM invents patterns not present in the signal.

**2. Information Leakage Check.** Since the question generation agent has access to metadata about the injected anomaly, there is a risk that the question itself might reveal the answer (e.g., "Why is there a sudden spike at step 50?"). We use a heuristic filter to detect questions that contain specific anomaly types or location indicators that should be part of the answer. Questions that inadvertently leak the ground truth are removed to ensure the task remains a valid test of detection and reasoning.

**3. Stylistic Normalization.** LLM-generated text can sometimes contain distinct stylistic artifacts ("LLM-isms") or repetitive phrasing. If left unchecked, these could serve as spurious correlations that a model might exploit (e.g., learning that longer answers always correspond to anomalies). We apply a normalization step to standardize the output format, remove repetitive filler phrases, and ensure a neutral tone. This minimizes the risk of the evaluator model relying on superficial textual cues rather than the semantic content of the explanation.

## E PHASE I TSAD RESULTS

**Datasets.** We benchmark nine public univariate time-series anomaly detection corpora: IOPS, MGAB, NAB, NEK, Power, SED, TODS, UCR, and YAHOO. These datasets span industrial KPIs, synthetic chaotic dynamics, web traffic, power consumption, network/system logs, and curated mixed-domain series. Each series is standardized via z-score normalization using training-set statistics.

**Baselines.** The comparison covers classical, deep generative, and foundation-style models. IForest (Liu et al., 2008) and LOF (Breunig et al., 2000) serve as nonparametric unsupervised baselines. OmniAnomaly (Su et al., 2019), USAD (Audibert et al., 2020), and TranAD (Tuli et al., 2022) represent deep unsupervised anomaly detectors. DADA (Shentu et al., 2024) and TSPulse (Ekambaram et al., 2025), MOMENT\_ZS (Goswami et al., 2024), Chronos (Ansari et al., 2024), TimesFM (Das et al., 2024), and Time\_MOE (Xiaoming et al., 2025) are pretrained time-series models evaluated in zero-shot or lightly adapted settings. AXIS denotes a semantic representation-based detector. Implementations follow public releases or authors' configurations when feasible.

**Metrics.** We report three standard metrics. (i) PA-F1: the point-adjusted F1 that credits a hit if any point within an anomalous window is flagged, computed from precision and recall after point adjustment; threshold for PA-F1 is selected on a validation split when available, or via an unsupervised percentile heuristic on training scores. (ii) AUC-ROC: area under the receiver operating characteristic, threshold-free and aggregated over all test points. (iii) AUC-PR: area under the precision-recall curve, which is more informative under severe class imbalance. Higher values indicate better performance for all metrics.

Table 5: Model Performance Comparison Across Univariate Datasets

| Dataset | Metric    | Foundation Models |              |              |              |              |              |              | Deep Learning |              |              | Classical |              |
|---------|-----------|-------------------|--------------|--------------|--------------|--------------|--------------|--------------|---------------|--------------|--------------|-----------|--------------|
|         |           | AXIS              | Chronos      | DADA         | MOMENT_ZS    | TS_Pulse     | Time_MOE     | TimesFM      | OmniAnomaly   | TranAD       | USAD         | IForest   | LOF          |
| IOPS    | PA-F1     | 57.19             | 64.17        | 55.52        | 44.76        | 50.59        | 41.58        | <b>87.89</b> | 53.50         | 53.04        | 41.24        | 15.31     | 41.38        |
|         | AUC-ROC   | 71.13             | 72.16        | 78.61        | <b>82.67</b> | 49.71        | 61.87        | 70.12        | 80.89         | 69.44        | 81.31        | 48.29     | 66.80        |
|         | AUC-PR    | 18.13             | 25.65        | <u>29.59</u> | 22.45        | 1.65         | 24.15        | 28.33        | <b>41.63</b>  | 25.51        | 21.96        | 6.49      | 25.63        |
| MGAB    | PA-F1     | 7.13              | 10.16        | 3.11         | 2.90         | <u>11.39</u> | 2.64         | 7.74         | 7.62          | 7.80         | 3.49         | 5.85      | <b>12.31</b> |
|         | AUC-ROC   | <b>69.97</b>      | 50.78        | 54.12        | 47.47        | 49.94        | 37.73        | 49.97        | 60.15         | <u>61.04</u> | 51.12        | 43.88     | 50.27        |
|         | AUC-PR    | <u>0.55</u>       | 0.31         | 0.31         | 0.25         | 0.27         | 0.20         | 0.27         | 0.41          | 0.42         | <b>1.74</b>  | 0.24      | 0.34         |
| NAB     | PA-F1     | 93.73             | 97.08        | 96.18        | 94.61        | 97.76        | 90.48        | <b>99.09</b> | <u>98.02</u>  | 97.93        | 93.42        | 42.81     | 86.79        |
|         | AUC-ROC   | 51.79             | 53.82        | 56.23        | <u>64.01</u> | 50.28        | 50.82        | 53.33        | 56.26         | 54.33        | <b>73.09</b> | 55.26     | 49.93        |
|         | AUC-PR    | 21.00             | 20.62        | 21.87        | <u>42.73</u> | 13.91        | 20.32        | 21.12        | 24.87         | 21.92        | <b>53.14</b> | 20.48     | 18.55        |
| NEK     | PA-F1     | 87.19             | 98.44        | <u>98.68</u> | 81.10        | 88.14        | 50.82        | <b>98.79</b> | 88.50         | 86.78        | 66.26        | 72.47     | 87.35        |
|         | AUC-ROC   | 53.28             | 57.60        | 82.51        | <b>92.02</b> | 53.94        | 37.41        | 62.64        | 88.85         | 81.25        | <u>91.65</u> | 85.66     | 81.38        |
|         | AUC-PR    | 30.32             | 30.63        | 44.90        | 55.75        | 16.34        | 7.13         | 34.05        | <b>73.10</b>  | <u>57.39</u> | 52.91        | 52.76     | 55.63        |
| Power   | PA-F1     | <b>98.94</b>      | 95.97        | 89.53        | 90.25        | <u>98.77</u> | 83.29        | 97.58        | 86.66         | 87.51        | 68.06        | 0.00      | 87.92        |
|         | AUC-ROC   | <u>62.47</u>      | 48.82        | 46.19        | 43.23        | 50.68        | 38.92        | 46.78        | 59.88         | 57.05        | <b>66.46</b> | 50.00     | 38.93        |
|         | AUC-PR    | <b>20.52</b>      | 10.44        | 10.07        | 10.68        | 11.09        | 9.01         | 9.98         | 13.64         | 12.37        | <u>17.30</u> | 10.97     | 8.98         |
| SED     | PA-F1     | <b>93.59</b>      | 38.77        | 18.69        | 1.92         | <u>70.26</u> | 33.29        | 32.49        | 2.25          | 4.49         | 0.00         | 31.62     | 0.00         |
|         | AUC-ROC   | <b>96.35</b>      | 53.03        | 14.85        | 1.43         | 49.23        | <u>69.08</u> | 29.64        | 28.93         | 12.89        | 10.71        | 27.96     | 27.35        |
|         | AUC-PR    | <b>73.76</b>      | 4.80         | 2.77         | 2.57         | 4.95         | <u>7.45</u>  | 3.26         | 3.35          | 2.78         | 2.68         | 3.26      | 3.25         |
| TODS    | PA-F1     | 77.50             | <b>83.40</b> | 61.20        | 26.86        | 53.03        | 44.92        | <u>81.26</u> | 38.82         | 40.31        | 40.86        | 33.25     | 54.62        |
|         | AUC-ROC   | <b>92.40</b>      | 68.45        | 68.16        | 46.17        | 50.20        | 51.68        | <u>72.96</u> | 49.69         | 48.87        | 53.92        | 51.16     | 53.12        |
|         | AUC-PR    | <b>68.20</b>      | 35.60        | 20.33        | 10.03        | 6.98         | 10.36        | <u>36.69</u> | 6.89          | 6.74         | 17.37        | 7.43      | 19.74        |
| UCR     | PA-F1     | 47.58             | 43.71        | 34.90        | 25.55        | <u>56.57</u> | 31.63        | <b>60.88</b> | 31.44         | 32.67        | 22.57        | 23.02     | 32.43        |
|         | AUC-ROC   | <b>79.34</b>      | 55.79        | 56.27        | 54.92        | 50.57        | 55.38        | <u>57.21</u> | 50.67         | 50.64        | 53.74        | 51.93     | 55.86        |
|         | AUC-PR    | <b>24.06</b>      | 6.11         | 2.19         | 6.92         | 0.85         | 2.12         | 6.35         | 2.91          | 2.32         | <u>8.08</u>  | 2.54      | 2.50         |
| YAHOO   | PA-F1     | 53.88             | <u>54.09</u> | 50.82        | 12.54        | 7.99         | 21.39        | <b>87.18</b> | 18.66         | 8.09         | 7.40         | 2.86      | 29.78        |
|         | AUC-ROC   | <b>96.55</b>      | 94.64        | 95.95        | 74.37        | 49.02        | 63.08        | <u>96.35</u> | 77.71         | 56.47        | 62.54        | 48.90     | 72.85        |
|         | AUC-PR    | <b>86.07</b>      | 70.75        | 76.66        | 4.84         | 1.49         | 22.08        | <u>79.23</u> | 16.28         | 2.90         | 3.72         | 1.66      | 44.26        |
| Overall | Avg. Rank | <b>3.81</b>       | 4.74         | 5.52         | 7.48         | 7.70         | 8.70         | <u>4.41</u>  | 5.48          | 7.00         | 6.78         | 9.07      | 7.30         |

Table 6: Model Performance Comparison Across Multivariate Datasets

| Dataset | Metric    | Foundation Models |              |              |              |              |              |         | Deep Learning |        |       | Classical    |         |
|---------|-----------|-------------------|--------------|--------------|--------------|--------------|--------------|---------|---------------|--------|-------|--------------|---------|
|         |           | AXIS              | Chronos      | DADA         | MOMENT_ZS    | TS_Pulse     | Time_MOE     | TimesFM | OmniAnomaly   | TranAD | USAD  | LOF          | IForest |
| MSL     | PA-F1     | 82.99             | 81.68        | 86.93        | <u>88.46</u> | 82.30        | 82.08        | 75.88   | 50.15         | 83.35  | 51.16 | <b>89.56</b> | 56.66   |
|         | AUC-ROC   | <u>72.17</u>      | 69.79        | <b>75.32</b> | 52.15        | 51.05        | 64.59        | 70.45   | 62.28         | 49.02  | 61.98 | 56.65        | 52.88   |
|         | AUC-PR    | <u>20.56</u>      | 20.21        | <b>26.42</b> | 11.60        | 7.46         | 19.83        | 20.34   | 17.19         | 7.42   | 17.24 | 15.18        | 11.31   |
| PSM     | PA-F1     | 93.50             | 96.82        | <b>98.99</b> | 93.97        | 96.10        | 94.32        | 95.18   | 60.53         | 84.45  | 62.26 | <u>96.87</u> | 80.10   |
|         | AUC-ROC   | 56.48             | 54.82        | 60.84        | <b>67.85</b> | 49.83        | <u>61.34</u> | 54.47   | 53.10         | 45.04  | 42.95 | <u>52.34</u> | 51.50   |
|         | AUC-PR    | 19.47             | 34.56        | 39.92        | <b>42.83</b> | 14.45        | <u>42.46</u> | 33.83   | 17.18         | 13.38  | 12.64 | 17.00        | 18.49   |
| SMAP    | PA-F1     | <b>86.76</b>      | 66.89        | 69.18        | 81.03        | 81.55        | 71.00        | 64.56   | 25.74         | 62.93  | 26.23 | <u>85.58</u> | 58.47   |
|         | AUC-ROC   | <b>62.61</b>      | <u>58.53</u> | 51.24        | 47.89        | 49.83        | 40.23        | 56.46   | 51.96         | 47.99  | 51.38 | 51.97        | 54.43   |
|         | AUC-PR    | <b>24.13</b>      | <u>15.21</u> | 12.08        | 11.90        | 4.03         | 10.56        | 13.87   | 4.07          | 3.93   | 4.18  | 7.73         | 7.93    |
| SMD     | PA-F1     | <b>96.15</b>      | 83.72        | 84.03        | 75.79        | 75.88        | 77.02        | 84.10   | 30.58         | 57.05  | 27.89 | <u>92.56</u> | 55.02   |
|         | AUC-ROC   | <b>74.26</b>      | 69.88        | 72.02        | 66.28        | 49.93        | 66.57        | 70.15   | 55.76         | 52.59  | 49.78 | <u>65.75</u> | 60.53   |
|         | AUC-PR    | <b>39.44</b>      | 11.68        | 13.16        | 11.33        | 4.58         | 11.31        | 13.32   | 5.96          | 5.45   | 5.47  | <u>15.72</u> | 11.04   |
| SWaT    | PA-F1     | 83.85             | 83.78        | 89.55        | 88.08        | <b>97.32</b> | 84.44        | 86.07   | 70.26         | 72.80  | 69.93 | <u>90.72</u> | 0.00    |
|         | AUC-ROC   | 55.49             | 29.85        | 79.96        | <b>81.96</b> | 50.38        | <u>80.74</u> | 24.67   | 42.56         | 41.55  | 41.99 | 50.38        | 50.00   |
|         | AUC-PR    | 17.48             | 8.84         | 50.60        | <u>70.79</u> | 15.69        | <b>70.85</b> | 8.58    | 15.21         | 14.72  | 16.04 | 16.64        | 15.49   |
| Overall | Avg. Rank | <b>3.20</b>       | 5.53         | <u>3.27</u>  | 5.13         | 7.87         | 5.13         | 5.53    | 9.07          | 9.93   | 9.73  | 4.93         | 8.60    |

**Results on Univariate Benchmarks.** The experimental results, summarized in Table 5, demonstrate that AXIS achieves competitive performance across nine public univariate benchmarks. To rigorously evaluate the statistical significance of these rankings, we present a Critical Difference (CD) diagram in Figure 8. AXIS achieves a Average Rank of 3.81. This validates that our Phase I encoder learns robust temporal representations essential for anomaly detection.

**Extensibility to Multivariate Contexts.** While our current work primarily focuses on univariate settings to establish the core “step-aligned hint” reasoning mechanism, our framework is inherently extensible to multivariate contexts. Specifically, we incorporate the Any-variate Attention mechanism (Woo et al., 2024), which allows the model to learn cross-channel interactions. By integrating this mechanism, we construct AXIS-multi, which effectively handles multivariate attention by enabling each time step to receive contextual hints incorporating information from related channels. To validate this extensibility, we further evaluated AXIS-multi on five standard multivariate datasets (MSL, PSM, SMAP, SMD, SWaT). As shown in Table 6, AXIS-multi achieves the best overall performance with an Average Rank of 3.20, outperforming recent time-series foundation models (e.g., Chronos, MOMENT). This confirms that our step-aligned hint mechanism scales effectively to high-dimensional signals, capturing cross-channel dependencies without performance degradation.



## G.2 EVALUATION CRITERIA AND WEIGHTS

For each `question_type`, the evaluator applies a fixed set of dimensions with 5-point guidelines and combines them via type-specific weights:

Table 8: Dimension Weights by Question Type.

|                        |                                                     |
|------------------------|-----------------------------------------------------|
| <b>multiple_choice</b> | correctness: 0.70, reasoning_quality: 0.30          |
| <b>open_ended</b>      | relevance: 0.30, completeness: 0.35, accuracy: 0.35 |
| <b>true_false</b>      | correctness: 0.60, justification_quality: 0.40      |

The dimension descriptions and scoring guidelines (1–5) are:

### **multiple\_choice**

- **correctness**: How accurate is the generated response compared to the expected answer?
  - 5: Perfect match, completely correct
  - 4: Mostly correct; minor deviations not affecting core meaning
  - 3: Partially correct; captures some key aspects but misses important details
  - 2: Somewhat relevant but with significant errors or omissions
  - 1: Incorrect or completely irrelevant
- **reasoning\_quality**: How well does the response demonstrate logical reasoning and explanation?
  - 5: Clear, logical, comprehensive reasoning fully explains the choice
  - 4: Good reasoning with minor gaps
  - 3: Adequate reasoning; lacks depth or has inconsistencies
  - 2: Weak reasoning; significant gaps or flawed logic
  - 1: No clear reasoning or completely flawed logic

### **open\_ended**

- **relevance**: How relevant and on-topic is the generated response?
  - 5: Completely relevant; directly addresses all aspects
  - 4: Highly relevant; minor omissions
  - 3: Moderately relevant; addresses core aspects but misses details
  - 2: Somewhat relevant; off-topic content or key omissions
  - 1: Irrelevant or off-topic
- **completeness**: How complete and comprehensive is the response?
  - 5: Fully comprehensive; covers all necessary aspects
  - 4: Mostly complete; minor gaps
  - 3: Adequately complete; missing some important details
  - 2: Incomplete; significant information missing
  - 1: Very incomplete
- **accuracy**: How factually accurate is the response?
  - 5: Completely accurate; no factual errors
  - 4: Mostly accurate; very minor inaccuracies
  - 3: Generally accurate; some notable errors
  - 2: Several factual errors affecting reliability
  - 1: Major factual errors or mostly inaccurate

1188 **true\_false**

1189

1190 • **correctness**: How correct is the T/F judgment and supporting explanation?

1191 – 5: Perfect judgment; excellent supporting explanation

1192 – 4: Correct judgment; good explanation

1193 – 3: Correct judgment; adequate explanation

1194 – 2: Incorrect judgment; reasonable attempt at explanation

1195 – 1: Incorrect judgment; poor or no explanation

1196 • **justification\_quality**: How well does the response justify the decision?

1197 – 5: Excellent justification with clear evidence and reasoning

1198 – 4: Good justification with solid evidence

1200 – 3: Adequate justification with some evidence

1201 – 2: Weak justification with little evidence

1202 – 1: No meaningful justification

1203

1204

1205

### G.3 ADVANCED SCORING FROM LOG-PROBABILITIES

1206 Let  $s \in \{1, 2, 3, 4, 5\}$  denote the raw score extracted from the LLM’s evaluation output. We also obtain

1207 token-level log-probabilities for score tokens  $\{1, \dots, 5\}$ . The evaluator constructs a distribution

1208 over scores by exponentiating and normalizing these log-probabilities:

1209

1210

1211

$$p(s) \propto \exp(\log p_s), \quad \tilde{p}(s) = \frac{\exp(\log p_s)}{\sum_{k=1}^5 \exp(\log p_k)}.$$

1212 The **weighted score** is the expectation under  $\tilde{p}$ :

1213

1214

1215

1216

$$\text{WeightedScore} = \sum_{s=1}^5 s \cdot \tilde{p}(s).$$

1217

1218

### G.4 ADVANCED G-EVAL PROMPT

1219

1220

1221

1222

1223

1224

1225

1226

1227

1228

1229

1230

1231

1232

1233

1234

1235

1236

1237

1238

1239

1240

1241

You are an expert evaluator for natural language generation systems. Your task is to evaluate the quality of generated responses using the G-Eval methodology with chain-of-thought reasoning.

Control the Maximum Length to 500 words.

**\*\*Evaluation Criterion:** {criterion.dimension}**\*\***  
{criterion.description}

**\*\*Scoring Guidelines:\*\***  
{guidelines\_text}

**\*\*Question:\*\*** {question}

**\*\*Expected Answer:\*\*** {expected\_answer}

**\*\*Generated Response:\*\*** {generated\_response}

**\*\*Instructions:\*\***

1. Analyze the generated response step by step using chain-of-thought reasoning
2. Compare it against the expected answer for the specified criterion
3. Consider both content quality and alignment with the expected answer
4. Provide detailed reasoning for your evaluation
5. Conclude with a single score from 1-5
6. Ignore error in index mismatch, just focus on the content

Please follow this exact format for your response:

```

1242
1243 **Step-by-step Analysis:**
1244 [Provide detailed chain-of-thought analysis]
1245
1246 **Comparison with Expected Answer:**
1247 [Compare generated response with expected answer]
1248
1249 **Final Assessment:**
1250 [Summarize your evaluation]
1251
1252 **Score:** [Single integer: 1, 2, 3, 4, or 5]

```

## 1253 G.5 DETAILED RESULTS OF G-EVAL

1255 **Visualize and pair-wised comparsion** Figures 9 to 11 present forest plots to visually summarize  
 1256 the pairwise model performance comparisons from Tables 1 to 3. The confidence intervals are  
 1257 calculated from the variance of the pairwise total scores.

1258 As shown in Fig. 9, our AXIS model demonstrates a strong performance. On Multiple-choice ques-  
 1259 tions, it significantly outperforms all models except for Image-LLM and Anon-LLM(Window). For  
 1260 True/False questions, AXIS significantly surpasses all other models, highlighting its advantage in  
 1261 objective answering. Furthermore, on Open-Ended questions, AXIS outperforms other models while  
 1262 achieving performance comparable to the General LLM (AnomLLM).

1263 Fig. 10 details an ablation study of our proposed AXIS model. The results demonstrate that AXIS  
 1264 consistently and significantly outperforms its variants ("w/o-windows", "w/o-task-hint", and "w/o-  
 1265 context-hint") across all three question categories. The confidence intervals for the mean paired  
 1266 difference are entirely below zero in all subplots, indicating that the removal of any of these com-  
 1267 ponents leads to a statistically significant degradation in performance. This underscores the integral  
 1268 contribution of each component to the overall efficacy of the AXIS model.

1269 Fig. 11 provides a comparative analysis of various open-source models against the Deepseek Llama  
 1270 8B (Inst) baseline. In multiple-choice questions, Deepseek Llama 8B shows a significant perfor-  
 1271 mance advantage over the Mistral 7B models, while its performance is statistically comparable to  
 1272 the Qwen2.5 7B series. For open-ended and true/false questions, Deepseek Llama 8B shows com-  
 1273 parable performance to most Qwen and Deepseek-Qwen variants, showing that the robustness of our  
 1274 AXIS design.

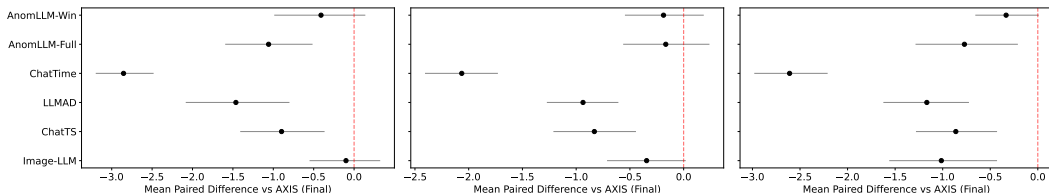

1283 Figure 9: Comparative analysis of baseline models against AXIS via forest plot. Each horizontal  
 1284 line represents the 95% bootstrap confidence interval for the mean paired score difference relative  
 1285 to the AXIS baseline. The central dot marks the point estimate of the mean difference. The vertical  
 1286 red dashed line at zero indicates no difference; confidence intervals crossing this line suggest that  
 1287 the model's performance is not statistically different from the baseline.

1289 **Analysis for different LLM judge:** We introduce gpt-4.1 as the second LLM judge to comple-  
 1290 ment our primary judge, Gemini-2.5. We then conduct a comprehensive inter-rater reliability anal-  
 1291 ysis using a human-annotated subset. Our analysis, summarized in Table 9, confirms the robustness  
 1292 of our evaluation methodology. First, we observe high consistency between our two LLM judges,  
 1293 Gemini-2.5 and Gpt-4.1, which achieve an overall Kendall's W of 0.882. This demonstrates that our  
 1294 evaluation prompts and criteria are stable and reproducible across different state-of-the-art models.  
 1295 Second, and more importantly, both LLM judges show strong alignment with human expert ratings.  
 Our primary judge, Gemini-2.5, achieves a strong agreement of  $W=0.743$  with human ratings, while

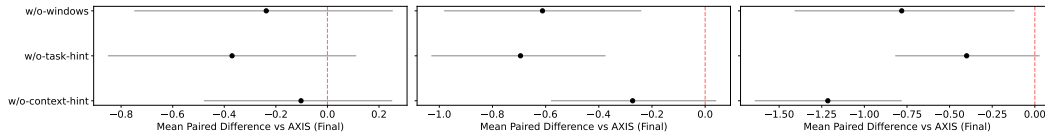

Figure 10: Forest plot comparing AXIS variants against the AXIS baseline. The plot displays the mean paired score difference and the 95% bootstrap confidence interval for each variant. The vertical red line at zero indicates no performance difference relative to AXIS.

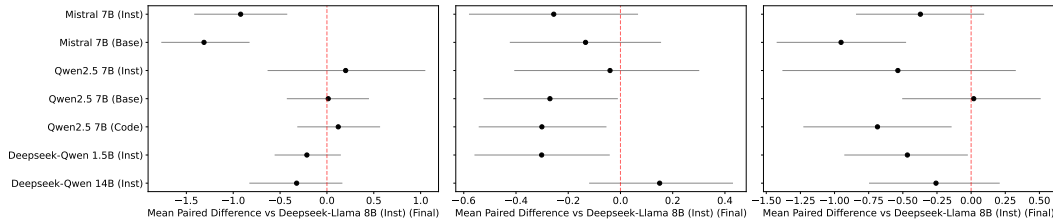

Figure 11: Forest plot for ablation studies, benchmarked against AXIS. This plot illustrates the mean paired score difference and the corresponding 95% bootstrap confidence interval for each ablated variant. The vertical red line at zero serves as the reference for no difference from the baseline.

our second judge, Gpt-4.1, also achieves a strong agreement of  $W=0.750$ . This alignment remains robust even for the most challenging open-ended questions, where the judges score  $W=0.670$  and  $W=0.679$ , respectively. To contextualize these results, we measure the inter-rater agreement among the human experts themselves, finding a Kendall’s  $W$  of 0.587. This indicates that our LLM judges not only agree with each other but also perform at a level of consistency comparable to human experts for this subjective task. We report all correlation coefficients using Kendall’s  $W$ , as shown in the table below.

Table 9: Inter-rater agreement (Kendall’s  $W$ ) between LLM judges and human experts.

| Question Type   | Gpt-4.1 vs. Human | Gemini-2.5 vs. Gpt-4.1 | Gemini-2.5 vs. Human | Human Inter-rater Agreement |
|-----------------|-------------------|------------------------|----------------------|-----------------------------|
| Overall         | 0.750             | 0.882                  | 0.743                | 0.587                       |
| Multiple Choice | 0.857             | 0.833                  | 0.750                | 0.667                       |
| Open-Ended      | 0.679             | 0.912                  | 0.670                | 0.587                       |
| True/False      | 0.749             | 0.856                  | 0.784                | 0.535                       |

## G.6 COMPUTATIONAL EFFICIENCY ANALYSIS

We analyze the computational overhead of AXIS compared to baseline methods by measuring average prompt token counts and generation latency across question types (see Table 11).

**Token Efficiency.** AXIS (14B) demonstrates high token efficiency, averaging  $\sim 335$  prompt tokens. This is comparable to ChatTS (14B) ( $\sim 363$  tokens) and significantly more efficient than text-serialization approaches like LLMAD ( $\sim 1370$  tokens) and Image LLM ( $\sim 1479$  tokens). While AnomLLM(Window) uses the fewest tokens, it sacrifices reasoning capability by limiting context to a local window.

**Latency and Performance Balance.** AXIS achieves a favorable balance between speed and performance. It incurs only a modest latency overhead ( $\sim 1.5\text{--}2\text{s}$ ) compared to ChatTS while delivering superior reasoning, and is  $\sim 7\times$  faster than ChatTime, which suffers from prohibitive latency. Both token counts and latencies remain consistent across question types, indicating robust efficiency for diverse reasoning tasks.

Table 10: G-eval results by LLM judge gpt-4.1

| Model           | Multiple Choice |             |             | Open Ended  |             |             |             | True False  |             |             |
|-----------------|-----------------|-------------|-------------|-------------|-------------|-------------|-------------|-------------|-------------|-------------|
|                 | Final           | Corr.       | Rsn. Qual.  | Final       | Rel.        | Comp.       | Acc.        | Final       | Corr.       | Justif.     |
| AXIS            | <b>4.52</b>     | <b>4.56</b> | <b>4.49</b> | <b>3.54</b> | <b>3.67</b> | <b>3.29</b> | <b>3.65</b> | <b>3.94</b> | <b>3.71</b> | <b>4.17</b> |
| Image LLM       | 4.40            | 4.35        | 4.44        | 3.40        | 3.58        | 3.24        | 3.38        | 2.98        | 2.71        | 3.24        |
| ChatTS          | 3.71            | 3.77        | 3.65        | 3.11        | 3.27        | 2.95        | 3.11        | 3.05        | 2.90        | 3.19        |
| LLMAD           | 3.66            | 3.30        | 4.02        | 2.86        | 2.93        | 2.80        | 2.85        | 3.50        | 3.31        | 3.69        |
| ChatTime        | 1.47            | 1.91        | 1.02        | 1.07        | 1.02        | 1.04        | 1.15        | 1.10        | 1.17        | 1.02        |
| AnomLLM(Full)   | 4.23            | 4.12        | 4.35        | 3.13        | 3.35        | 2.98        | 3.05        | 2.76        | 2.69        | 2.83        |
| AnomLLM(Window) | 2.80            | 2.81        | 2.79        | 2.93        | 3.05        | 2.58        | 3.15        | 2.55        | 2.57        | 2.52        |

Table 11: Comparison of Computational Efficiency: Prompt Tokens, Latency, and Memory

| Model           | Multiple Choice |         |          | Open Ended |         |          | True False |         |          |
|-----------------|-----------------|---------|----------|------------|---------|----------|------------|---------|----------|
|                 | Tokens          | Lat (s) | Mem (GB) | Tokens     | Lat (s) | Mem (GB) | Tokens     | Lat (s) | Mem (GB) |
| Image LLM       | 1548.42         | 9.57    | -        | 1455.33    | 10.83   | -        | 1433.33    | 9.21    | -        |
| LLMAD           | 1364.42         | 2.44    | -        | 1375.16    | 2.36    | -        | 1372.00    | 2.44    | -        |
| AnomLLM(Full)   | 3083.81         | 1.75    | -        | 3075.64    | 2.01    | -        | 2983.40    | 1.82    | -        |
| AnomLLM(Window) | 312.53          | 0.73    | -        | 258.00     | 0.74    | -        | 240.43     | 0.70    | -        |
| ChatTime 14B    | 288.49          | 31.06   | 38.5     | 182.45     | 28.88   | 37.4     | 181.05     | 29.15   | 38.1     |
| ChatTS 14B      | 411.95          | 5.02    | 32.3     | 347.24     | 5.77    | 31.9     | 330.10     | 4.75    | 32.1     |
| AXIS 14B        | 376.05          | 13.70   | 41.6     | 321.29     | 13.76   | 40.5     | 303.90     | 12.98   | 41.0     |

## H PROCEDURE AND DETAIL RESULTS FOR HUMAN-BASED EVALUATION

### H.1 DESIGNS OF EXPERIMENTS

**Questionnaire Design and Structure.** Our human expert questionnaire is systematically designed to evaluate model explanations across multiple dimensions with rigorous controls for bias and consistency. Each questionnaire comprises: (1) **Question Information:** the original question, expected answer, and question type classification (multiple choice, open-ended, or true/false); (2) **Time Series Visualization:** a plot showing the full time series with the target window highlighted to provide visual context for assessment; (3) **Model Responses:** all baseline model outputs presented in a randomized order to eliminate position bias; (4) **Evaluation Criteria:** dimension-specific scoring guidelines adapted from the G-Eval methodology, employing 5-point Likert scales for correctness, reasoning quality, relevance, completeness, accuracy, and justification quality tailored to each question type; (5) **Scoring Tables:** structured evaluation forms for systematic criterion-based assessment; (6) **Model Ranking:** comparative ranking of all models with written justifications to capture qualitative insights.

**Expert Recruitment and Annotation Protocol.** For this study, we evaluate 140 unique questions, resulting in 280 completed questionnaires. We recruit 28 human experts through a rigorous vetting process targeting researchers with established expertise in time-series analysis and machine learning. All annotators hold advanced degrees (Ph.D. candidates or post-doctoral fellows) and are recruited from our institution and collaborating academic research laboratories. Experts are compensated at standard academic research rates for their time and effort. To ensure annotation quality and mitigate individual bias, we implement a double-blind protocol wherein each questionnaire is independently evaluated by three randomly assigned experts from the pool of 28, with neither annotator aware of the other’s identity or responses. To quantify inter-rater reliability, we compute Kendall’s  $W$  (Coefficient of Concordance), which is well-suited for measuring agreement among multiple raters on ordinal data. Our analysis yields Kendall’s  $W = 0.587$ , indicating a “moderate” to “substantial” level of agreement among our expert panel. This coefficient is notably comparable to inter-rater agreement levels reported in similar expert evaluation studies, confirming that our human-annotated dataset provides a reliable and internally consistent gold standard for model assessment.

1404  
1405  
1406  
1407  
1408  
1409  
1410  
1411  
1412  
1413  
1414  
1415  
1416  
1417  
1418  
1419  
1420  
1421  
1422  
1423  
1424  
1425  
1426  
1427  
1428  
1429  
1430  
1431  
1432  
1433  
1434  
1435  
1436  
1437  
1438  
1439  
1440  
1441  
1442  
1443  
1444  
1445  
1446  
1447  
1448  
1449  
1450  
1451  
1452  
1453  
1454  
1455  
1456  
1457

Human Expert Evaluation Questionnaire Example

**Question 1**  
**Question Type:** multiple\_choice  
**Question:** Which of the following best describes the likelihood of detecting an anomaly within the time series window from step 491 to 521, given its observed behavior?  
A) There is a sudden spike at the start of the window that indicates potential anomalous activity B) The window displays periodic irregularities that suggest subtle anomalies C) The window exhibits consistent and stable behavior, suggesting no detectable anomalies D) The pattern shows gradual drift, implying an evolving anomaly towards the window’s end  
**Expected Answer:** C) The window exhibits consistent and stable behavior, suggesting no detectable anomalies. The current\_value data fluctuates around zero with both positive and negative values but does not display any abrupt spikes, sustained trends, or irregular periodicities...  
**Time Series Visualization:** [Plot showing full time series with highlighted window]  
**Model Responses:**  
**Model 1** To determine anomaly likelihood in the window from step 491 to 521, let’s examine the values: [0.12, -2.45, -1.15, ...]. Within this window, there is a sharp drop from 0.12 to -2.45 at the very start... \*\*A) There is a sudden spike at the start of the window that indicates potential anomalous activity\*\*  
**Model 2** Within the specified window (indices 491 to 521), the data shows fluctuating values without any abrupt spikes or consistent irregular patterns...  
**Model 3** The observed behavior within the time series window from step 491 to 521 indicates no sudden spikes or abrupt changes... \*\*C) The window exhibits consistent and stable behavior, suggesting no f anomalies.\*\*  
**Model 4** The time series visualization highlights the analysis window from step 491 to 521... \*\*C) The window exhibits consistent and stable behavior, suggesting no detectable anomalies.\*\*  
**Model 5** {"briefExplanation": {"step1\_global": "The overall trend of the latest 31 data points is stable...", "is\_anomaly": false, "anomalies": [], ...}  
**Model 6** \*\*Answer: C) The window exhibits consistent and stable behavior, suggesting no detectable anomalies.\*\* The time series window from step 491 to 521 shows a mix of positive and negative values with moderate fluctuations, but there are no sudden spikes...  
**Evaluation Criteria:**  
**Correctness (1-5):** How accurate is the generated response compared to the expected answer? **Reasoning Quality (1-5):** How well does the response demonstrate logical reasoning and explanation?

|                       | Model   | Correctness | Reasoning Quality | Comments |
|-----------------------|---------|-------------|-------------------|----------|
| <b>Scoring Table:</b> | Model 1 | ---         | ---               | ---      |
|                       | Model 2 | ---         | ---               | ---      |
|                       | Model 3 | ---         | ---               | ---      |
|                       | Model 4 | ---         | ---               | ---      |
|                       | Model 5 | ---         | ---               | ---      |
|                       | Model 6 | ---         | ---               | ---      |

**Model Ranking:** Rank all models from best (1) to worst (6) with justifications.

## H.2 DETAILED RESULTS FOR HUMAN EVALUATION

Fig. 12 provides a criterion-level breakdown of human evaluation across the three question types. AXIS ranks first consistently. On Multiple Choice questions, it achieves the best scores in both *Correctness* and *Reasoning Quality*, with a clear margin over the next best visual baseline. This indicates that our hint-based conditioning not only selects the right option but also articulates concise, logically grounded rationale.

For Open-Ended questions, AXIS leads on *Relevance*, *Completeness*, and *Accuracy*, reflecting faithful, fully supported explanations rather than surface descriptors. On True/False questions, it also tops both *Correctness* and *Justification Quality*, showing strong calibration and evidence-backed decisions. Overall, these results demonstrate that the proposed three-pathway design (symbolic

numeric grounding, context-integrated local hints, and task-prior hints) confers robust advantages across formats—surpassing specialized TS-LLMs and multimodal vision–language approaches in both accuracy and human-judged explanatory quality.

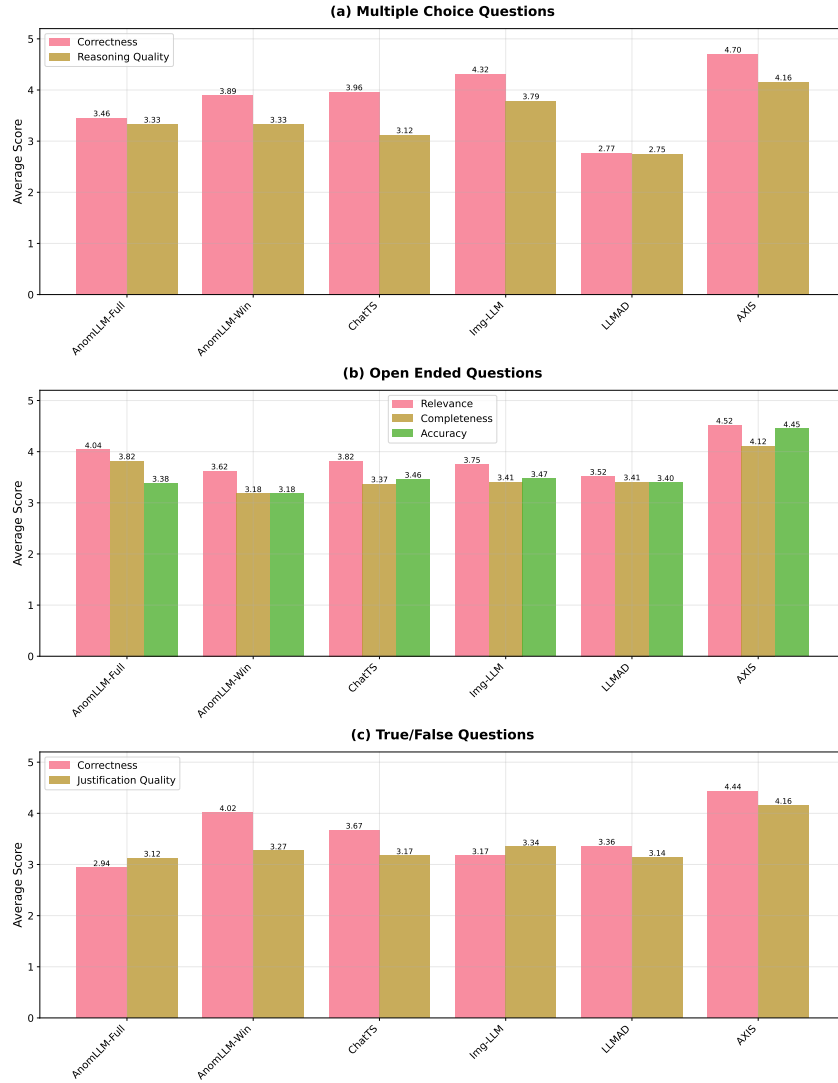

Figure 12: The mean scores by human evaluation for (a) multiple choice question, (b) open ended questions and (c) true/false questions

### H.3 BENCHMARK CONSTRUCTION & EVALUATION FOR PUBLIC DATASETS

To evaluate the generalization capabilities of our model on real-world data, we construct a comprehensive human evaluation benchmark using 108 time series from three public datasets: YAHOO, TODS, and NEK. These datasets cover diverse domains including web traffic, distributed system metrics, and sensor data. For each time series, we design two distinct question formats: a True/False (TF) question and a Multiple-Choice Question (MCQ), to assess the quality of generated explanations from different perspectives.

The benchmark construction process begins with a deterministic, seed-based sampling procedure to select two representative windows from each of the 108 time series, ensuring reproducibility. For each series, we sample:

- **An Anomaly Window:** A segment of 15 to 40 time steps that contains at least one point labeled as an anomaly.
- **A Normal Window:** A segment of the same length range (15-40 steps) containing exclusively normal data points.

Each selected window is visualized by highlighting it on a plot of the entire time series, providing essential visual context for the evaluation. These selected windows and their corresponding visualizations form the basis for both the TF and MCQ tasks.

**True/False (TF) Question Generation** For the TF task, we formulate a standardized question for every window: *"True or False: The time series window from step {start} to {end} shows only normal behavior, with no evidence of sudden deviations or irregular patterns that would indicate an anomaly."* The ground truth answer is "False" for anomaly windows and "True" for normal windows. The ground truth explanation for an anomaly window is derived from a predefined set of detailed descriptions corresponding to expert-provided labels (e.g., "downward spike," "sudden increase"), while the explanation for a normal window confirms the absence of anomalous patterns.

**Multiple-Choice Question (MCQ) Generation** Using the same set of windows, we design an MCQ task to assess a model's ability to not only detect but also correctly classify anomalies. The question asks: *"Which of the following best describes the anomaly detection results within the time series window spanning steps {start} to {end}?"* For each question, we generate three distinct options:

- **The Correct Option:** This option accurately describes the window's content. For an anomaly window, it corresponds to the specific, expert-labeled anomaly type (e.g., "upward spike"). For a normal window, it is the "normal" option.
- **Distractor Options:** Two incorrect options are provided to serve as distractors. If the window is anomalous, the options include "normal" and another randomly selected anomaly type from the overall pool of labels. If the window is normal, the distractors are two different, randomly selected anomaly types.

Crucially, each option is presented not just as a short label but as a full descriptive sentence (e.g., *"Upward Spike anomaly: There is a sharp upward jump in the measurements."*) to ensure clarity and prevent ambiguity. This design forces the model to discern nuanced differences between various anomaly types and normal behavior.

**Evaluation Criteria** To ensure a granular assessment of the models' explanatory power, we establish a detailed scoring rubric for both TF and MCQ tasks, administered by expert human annotators. For the **True/False task**, we use a 6-point scale (0–5) to evaluate both the correctness of the binary answer and the quality of the accompanying justification. A score of 5 represents a correct T/F judgment with a clear, accurate, and comprehensive explanation. Lower scores are assigned for answers with less precise, generic, or irrelevant justifications. A score of 0 indicates an incorrect T/F judgment with a nonsensical explanation. For the **Multiple-Choice task**, scores are assigned based on the model's ability to not only detect but also correctly classify the anomaly:

- **4–5 (Correct Classification):** A score of 5 is awarded for correctly identifying the specific anomaly type (or 'normal') with a clear and accurate explanation. A score of 4 is given for a correct classification with a more generic or slightly flawed explanation.
- **2–3 (Correct Detection, Incorrect Classification):** A score of 3 is assigned if the model correctly identifies the window as anomalous but selects the wrong anomaly type, providing a plausible justification for its incorrect choice. A score of 2 is given for the same error but with a poor or irrelevant explanation.
- **0 (Incorrect Detection):** A score of 0 is given if the model fails to correctly determine whether an anomaly is present (e.g., classifying an anomalous window as 'normal' or vice versa).

This multi-faceted evaluation framework allows us to capture nuanced differences in the quality of explanations beyond simple accuracy metrics.

## I CAUSAL ABLATION ANALYSIS FOR HINT TOKENS

To analyze the individual contribution of each local hint token to the model’s generation quality, we implement a causal ablation study. This method systematically removes or modifies specific hint tokens to quantify their importance in producing accurate explanations.

Given hint embeddings  $\tilde{\mathbf{H}}_{s:e} \in \mathbb{R}^{(e-s) \times d_h}$ , we measure the contribution of each local hint token at position  $i$  within the target window  $[s, e)$  through the following procedure:

**Baseline Computation.** First, we compute the baseline log-likelihood using the complete hint embeddings:

$$\mathcal{L}_{\text{baseline}} = -\log P(\mathbf{y} | \tilde{\mathbf{H}}_{s:e}, q, \tilde{\mathbf{F}}),$$

where  $\mathbf{y}$  is the target explanation,  $q$  is the query, and  $\tilde{\mathbf{F}}$  represents the task-prior hints.

**Ablation Methods.** For each position  $i \in [s, e)$ , we create an ablated version of the hint embeddings  $\tilde{\mathbf{H}}_{s:e}^{(i)}$  using **Zero Replacement**:  $\tilde{\mathbf{H}}_{s:e}^{(i)}[i - s] = \mathbf{0}$ .

**Contribution Score.** The contribution score for position  $i$  is computed as:

$$C_i = \mathcal{L}_{\text{baseline}} - \mathcal{L}_{\text{ablated}}^{(i)},$$

where  $\mathcal{L}_{\text{ablated}}^{(i)} = -\log P(\mathbf{y} | \tilde{\mathbf{H}}_{s:e}^{(i)}, q, \tilde{\mathbf{F}})$ . A positive  $C_i$  indicates that removing the hint at position  $i$  degrades the model’s performance, suggesting that this position contributes positively to explanation generation.

**Validation of Context-Integrated Hints via Causal Ablation Analysis.** As depicted in Fig. 13 and Fig. 14, the causal ablation analysis provides empirical evidence for the efficacy of our proposed hint mechanism. A predominant observation across both examples is that the majority of the contribution scores, denoted by  $C_i$ , are positive ( $C_i > 0$ ). According to the formulation presented in Appx. I, a positive  $C_i$  indicates that ablating the hint token at position  $i$  degrades the model’s performance, as measured by an increase in the negative log-likelihood of the target explanation. This finding strongly supports our hypothesis that the context-integrated, step-aligned hints furnish valuable guidance for the model, making a net positive contribution to the generation of high-quality answers.

Furthermore, a more nuanced pattern emerges from the results. We observe that in regions where the time series exhibits significant volatility or sharp fluctuations, the corresponding contribution scores are comparatively lower. This suggests that the inherent complexity and unpredictability of volatile segments in the time series can diminish the marginal utility of individual hint tokens. In essence, while the hints remain beneficial overall, their directional impact is partially mitigated by the increased difficulty of the task in these challenging temporal regions.

## J ADDITIONAL SENSITIVITY AND ROBUSTNESS ANALYSES

**Analysis of Distractor Design in Multiple Choice Questions.** We investigate the hypothesis that the divergent impact of the context-integrated hint across question types stems from the distinct reasoning processes required. While True/False questions demand binary judgments often necessitating global context, Multiple Choice Questions (MCQs) allow for elimination strategies. To validate this, we constructed an evaluation set of 140 MCQs with varying numbers of options ( $N \in \{2, 3, 4\}$ ). Table 12 presents the performance of AXIS and its ablated variants. We observe that with fewer options (2 or 3), where choices are broader, the performance gap between the full model and the ‘w/o-context-hint’ variant is significant. As the number of options increases to 4, distractors become more specific, allowing the model to rely more on localized features (symbolic numeric hints) for elimination, thereby reducing the relative impact of the global context hint. This confirms that the utility of context hints in MCQs is modulated by distractor complexity.

1620  
 1621  
 1622  
 1623  
 1624  
 1625  
 1626  
 1627  
 1628  
 1629  
 1630  
 1631  
 1632  
 1633  
 1634  
 1635  
 1636  
 1637  
 1638  
 1639  
 1640  
 1641  
 1642  
 1643  
 1644  
 1645  
 1646  
 1647  
 1648  
 1649  
 1650  
 1651  
 1652  
 1653  
 1654  
 1655  
 1656  
 1657  
 1658  
 1659  
 1660  
 1661  
 1662  
 1663  
 1664  
 1665  
 1666  
 1667  
 1668  
 1669  
 1670  
 1671  
 1672  
 1673

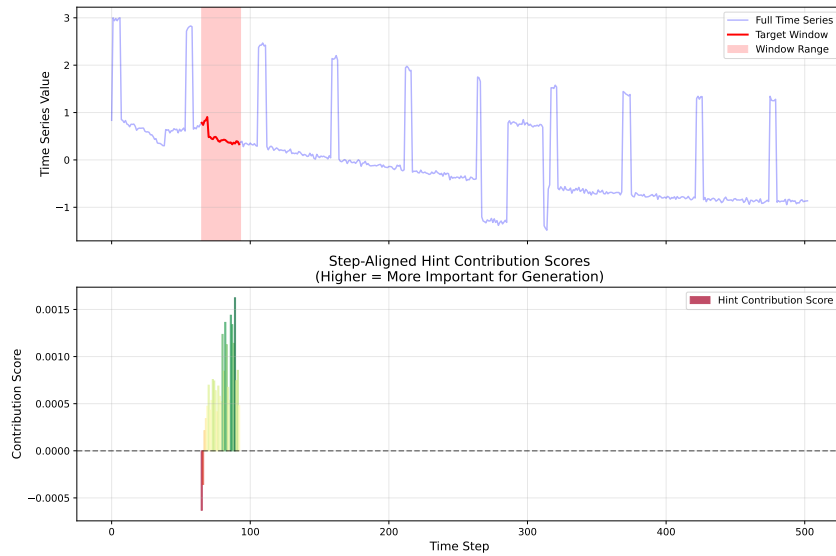

Figure 13: Causal Ablation Analysis of Step-Aligned Hint Tokens. The figure visualizes the contribution score  $C_i$  for each hint token, computed via our causal ablation method, alongside the original input time series.

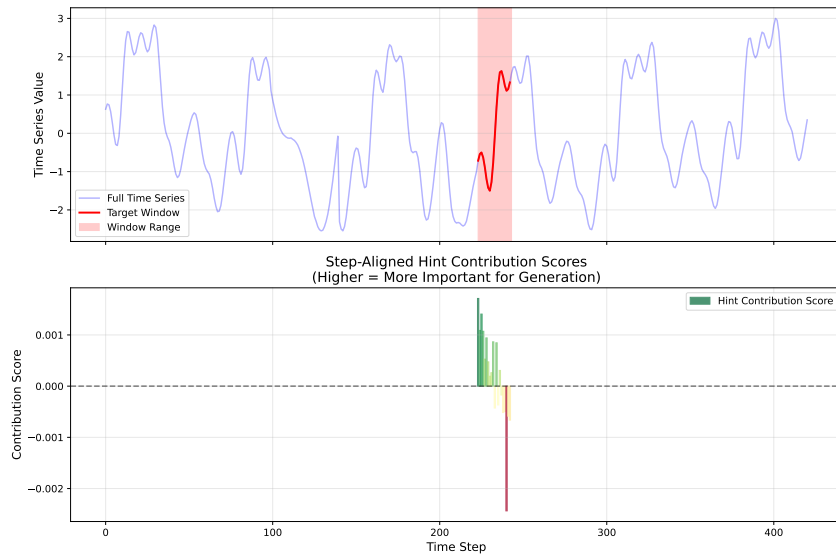

Figure 14: Causal Ablation Analysis of Step-Aligned Hint Tokens. The figure visualizes the contribution score  $C_i$  for each hint token, computed via our causal ablation method, alongside the original input time series.

Table 12: Impact of Distractor Options on Model Performance across Ablations

| Model            | 2 Options         | 3 Options         | 4 Options         |
|------------------|-------------------|-------------------|-------------------|
| <b>AXIS</b>      | $3.961 \pm 0.304$ | $3.874 \pm 0.372$ | $3.983 \pm 0.344$ |
| w/o-context-hint | $3.425 \pm 0.336$ | $3.371 \pm 0.332$ | $3.791 \pm 0.334$ |
| w/o-fixed-hint   | $3.249 \pm 0.346$ | $3.369 \pm 0.419$ | $3.772 \pm 0.381$ |
| w/o-windows      | $3.507 \pm 0.299$ | $3.823 \pm 0.311$ | $3.734 \pm 0.344$ |

**Analysis of Window Length Sensitivity.** We further analyze the impact of the input question-window length  $[s, e]$  on performance by varying it from 10 to 160 time steps. Figure 15 illustrates the sensitivity patterns across question types. For Multiple Choice and Open-Ended questions, performance follows an inverted U-shaped trend. Initial increases in window size improve reasoning by providing more information, but performance declines beyond 40-80 steps, likely due to the processing burden of long numerical sequences on the LLM. In contrast, True/False questions exhibit stability across window sizes. This robustness suggests that binary judgments rely more on the global semantic context provided by the ‘context-integrated hint’ rather than precise local numerical patterns, making them less sensitive to the granularity of the windowed input.

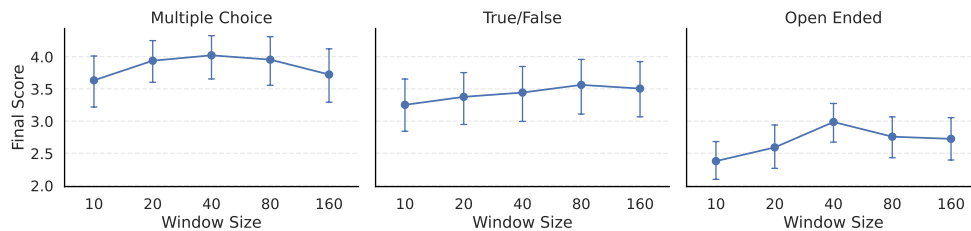

Figure 15: Performance sensitivity to variations in question-window length across different question types.

**Robustness Against Global Noise Injection.** To assess model robustness without introducing ambiguity often caused by local perturbations in anomaly detection tasks, we evaluate performance under global Gaussian noise injection. We add zero-mean Gaussian noise  $\epsilon \sim \mathcal{N}(0, \sigma^2)$  with scales  $\sigma \in \{0.1, 0.3, 0.7, 1.5\}$  to the input series. As shown in Figure 16, the model demonstrates strong robustness in discriminative tasks (Multiple Choice and True/False), maintaining stable performance up to noise scales of 0.7. This indicates effective filtering of high-frequency noise to focus on dominant anomalous features. Conversely, the generative Open-Ended task shows higher sensitivity, with performance decreasing monotonically as noise increases, reflecting the challenge of generating detailed semantic descriptions from obscured signal morphologies.

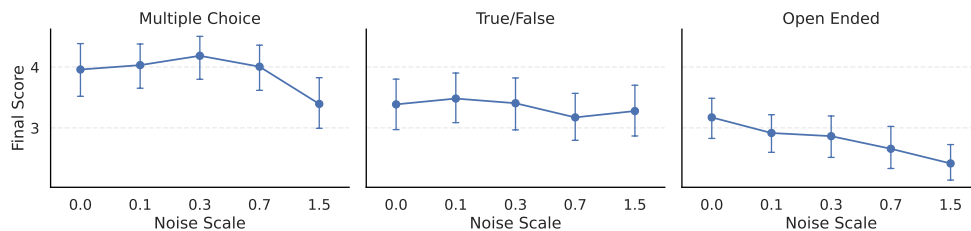

Figure 16: Model robustness evaluation under varying scales of global Gaussian noise injection.
